# Supplementary material
Source: Research Square preprint supplement (doi:10.21203/rs.3.rs-9359156/v1)
Supplement: Supplementary file 1 [file 3ddb4970dc4bc347412580b4.xlsx]

## Sheet: Sheet1
Lake Pulse Top-Bottom Dating	Ecozone		Total																Total											Excess 210Pb using 214-Pb	Excess 210Pb using 214-Pb	Uncertainty Excess Pb 210	Pb-210 Ex above uncertainty			Lat_center	Long_center	Depth_m	Area_km2	Altitude	HumanImpact_index
			210-Pb	210-Pb (error)	214-Pb	214-Pb (error)	214-Bi	214-Bi (error)	137-Cs	137-Cs (error)	241-Am	241-Am (error)						Midpoint minus	210-Pb	210-Pb (error)	214-Pb	214-Pb (error)	214-Bi	214-Bi (error)	137-Cs	137-Cs (error)	241-Am	241-Am (error)			min 8.33
			[Bq/kg]	[Bq/kg]	[Bq/kg]	[Bq/kg]	[Bq/kg]	[Bq/kg]	[Bq/kg]	[Bq/kg]	[Bq/kg]	[Bq/kg]						target bottom	[Bq/kg]	[Bq/kg]	[Bq/kg]	[Bq/kg]	[Bq/kg]	[Bq/kg]	[Bq/kg]	[Bq/kg]	[Bq/kg]	[Bq/kg]
LakeID		Interval	pb210	pb210err	pb214	pb214err	bi214	bi214err	cs137	cs137err	am241	am241err		Interval	Top_Bottom	Depth (cm)	Target Bottom Depth	depth	pb210	pb210err	pb214	pb214err	bi214	bi214err	cs137	cs137err	am241	am241err
07-033	Atlantic Highlands	0-1	688.86	56.19	55.26	8.58	75.06	18.26	21.06	4.96	0	3.79		(x-3)-(x-2)	Bottom	35-36	32	3.5	41.77	31.9	18.96	7.94	47.87	17.25	0	4.1	0.81	3.7		22.81	22.81	32.8733	-10.0633			46.4165	-66.9438	1.65	0.301346	270	0.088873
17-012	Atlantic Highlands	0-1	669.73	61.79	16.49	8.12	26.75	23.06	94.31	8.13	0	4.88		(x-3)-(x-2)	Bottom	35-36	32	3.5	4.17	70.96	3.09	13.13	59.49	37.71	0	8.27	0	7.97		1.08	8.33	72.1645	-71.0845			48.797	-64.5776	2.3	0.896033	90	0.003714
17-017	Atlantic Highlands	0-1	817.19	51.23	85.28	5.33	106.27	11.03	136.08	8.37	1.65	2.18		(x-3)-(x-2)	Bottom	29-30	32	-2.5	62.28	18.78	53.93	4.57	58.65	9.22	0	2.09	0	1.98		8.35	8.35	19.328	-10.978			48.7877	-64.8272	18	0.942383	199	0.097961
17-027	Atlantic Highlands	0-1	844.6	63.96	18.82	6.84	33.44	19.86	103.74	7.9	5.65	4.22		(x-3)-(x-2)	Bottom	32-33	32	0.5	50.56	43.23	32.82	8.13	27.91	22.79	0.5	4.79	0	4.71		17.74	17.74	43.9878	-26.2478			48.2131	-65.8524	11	0.279731	52	0.105471
17-043	Atlantic Highlands	0-1	995.65	80.41	27.69	9.22	55.57	26.24	64.26	7.81	0.48	5.64		(x-3)-(x-2)	Bottom	31-32	32	-0.5	38.38	37.39	28.31	6.92	50.97	20	0	4.13	0	4.08		10.07	10.07	38.025	-27.955			47.011	-66.9702	13	11.0872	385	0.053354
17-044	Atlantic Highlands	0-1	607.52	52.35	49.16	7.22	86.53	13.58	66.16	6.66	0	4.02		(x-3)-(x-2)	Bottom	34-35	32	2.5	6.14	41.98	37.41	8.61	70.25	15.53	0	5.55	0	4.75		-31.27	8.33	42.8539	-74.1239			46.4607	-66.9724	6.2	2.2871	242	0.023157
17-054	Atlantic Highlands	0-1	1229.02	144.16	29.99	18.11	110.65	38.43	109.74	17.15	0	11.68		(x-3)-(x-2)	Bottom	38-39	32	6.5	0	83.44	59.14	14.59	84.04	30.21	0	9.61	0	9.44		-59.14	8.33	84.706	-143.846			47.6951	-67.6448	4.5	0.230981	241	0.140942
17-060	Atlantic Highlands	0-1	827.88	105.65	43.79	14.1	95.61	29.68	45.89	11.33	0	9.24		(x-3)-(x-2)	Bottom	46-47	32	14.5	24.75	50.89	36.55	8.84	58.72	18.51	0	5.85	0	5.6		-11.8	8.33	51.6521	-63.4521			48.6008	-67.8211	5.7	0.409555	211	0.392439
17-062	Atlantic Highlands	0-1	498.47	79.13	14.61	16.47	37.32	34.87	36.41	9.92	0	7.23		(x-3)-(x-2)	Bottom	35-36	32	3.5	33.39	45.04	12.92	11.47	31.23	24.32	0	6.06	0	5.06		20.47	20.47	46.4775	-26.0075			48.5574	-68.1617	1.1	0.112007	129	0.200964
17-063	Atlantic Highlands	0-1	923.59	74.54	32.92	8.47	54.76	24.44	91.96	8.36	0	4.93		(x-3)-(x-2)	Bottom	47-48	32	15.5	36.01	59.44	22.17	11.59	44.47	32.87	0	6.69	0	6.66		13.84	13.84	60.5594	-46.7194			48.2898	-68.4068	11	0.69932	234	0.17344
17-067	Atlantic Highlands	0-1	1584.09	117.78	32.1	12.02	38.3	33.96	115.88	11.5	0	7.15		(x-3)-(x-2)	Bottom	37-38	32	5.5	0	73.75	35.62	14.78	23.44	42.76	0	8.97	1.07	8.53		-35.62	8.33	75.2164	-110.836			48.1011	-68.6917	17	7.69724	216	0.013437
17-075	Atlantic Highlands	0-1	385.56	118.27	31.28	17.32	135.45	38.03	29.03	13.9	0	11.86		(x-3)-(x-2)	Bottom	29-30	32	-2.5	17.44	35.8	25.02	6.24	56.33	13.2	0	4.12	0	3.95		-7.58	8.33	36.3398	-43.9198			48.0751	-69.1065	9	0.153055	170	0.084668
17-077	Atlantic Highlands	0-1	362.17	39.79	31.45	7.06	63.9	15.19	16.43	4.19	0	3.1		(x-3)-(x-2)	Bottom	31-32	32	-0.5	37.06	53.2	10.59	12.57	52.5	27.76	5.82	6.99	0	5.8		26.47	26.47	54.6648	-28.1948			47.9469	-69.2254	4.2	0.100586	192	0.178834
17-090	Atlantic Highlands	0-1	376.96	57.51	34.1	9.22	59.58	26.23	43.47	6.93	0.16	5.47		(x-3)-(x-2)	Bottom	31-32	32	-0.5	6.59	38.42	34.8	7.41	55.19	21.14	0	4.53	0	4.32		-28.21	8.33	39.1281	-67.3381			46.1377	-70.8096	6	0.273024	266	0.02381
17-092	Atlantic Highlands	0-1	815.56	51.87	39.53	4.57	38.02	12.14	22.33	3.32	0	2.62		(x-3)-(x-2)	Bottom	30-31	32	-1.5	45.19	27.5	34.88	5.67	46.56	14.31	0	2.89	0	2.83		10.31	10.31	28.0784	-17.7684			45.5379	-70.8897	58	28.2585	396	0.037492
17-109	Atlantic Highlands	0-1	573.17	51.26	35.38	6.68	33.13	18.64	9.12	4.28	0	3.82		(x-3)-(x-2)	Bottom	29-30	32	-2.5	48.27	32.87	28.63	6.2	43.16	17.57	0.58	3.87	0	3.48		19.64	19.64	33.4496	-13.8096			45.3052	-72.0413	19	10.9529	194	0.257661
17-111	Atlantic Highlands	0-1	2109.75	140.11	21.06	11.58	92	21.24	269.04	19.34	2.27	6.66		(x-3)-(x-2)	Bottom	31.5-32.5	32	0	0	53.46	5.92	10.95	70.37	20.42	0	7.04	0.32	6.18		-5.92	8.33	54.5699	-60.4899			45.4085	-72.0989	19	3.37608	275	0.039934
17-116	Atlantic Highlands	0-1	674.16	60.57	41.08	7.3	47.16	14.69	42.28	6.13	0.6	4.71		(x-3)-(x-2)	Bottom	30-31	32	-1.5	23.16	35.23	22.43	6.21	63.99	13.31	0	4.17	0	3.77		0.73	8.33	35.7731	-35.0431			45.4565	-72.2063	17	0.506247	291	0.094375
17-117	Atlantic Highlands	0-1	1041.37	69.92	49.02	6.55	66.72	18.39	28.06	4.56	0	3.73		(x-3)-(x-2)	Bottom	30-31	32	-1.5	36.91	21.17	41.55	4.05	45.89	10.6	0	2.25	0.06	2.32		-4.64	8.33	21.5539	-26.1939			45.0268	-72.2468	85	99.0314	208	0.149567
17-122	Atlantic Highlands	0-1	306.66	61.17	12.88	9.81	11.8	28.13	40.18	7.38	0	5.94		(x-3)-(x-2)	Bottom	29-30	32	-2.5	48.57	80.17	15.97	15.3	63.74	43.99	6.06	9.6	0	8.99		32.6	32.6	81.6169	-49.0169			45.467	-72.6535	5.5	2.00575	128	0.252821
07-005	Atlantic Maritime	0-1	276.09	41.41	36.2	6.65	44.76	18.69	89.86	7.05	0	3.72		(x-3)-(x-2)	Bottom	29-30	32	-2.5	0	63.42	12.11	12.43	24.66	36.42	0	7.32	0	7.33		-12.11	8.33	64.6266	-76.7366			45.9027	-64.1551	1.6	0.997314	9	0.000236
07-006	Atlantic Maritime	0-1	370.3	36.54	32.15	4.53	45.98	9.55	71.23	5.78	0	2.88		(x-3)-(x-2)	Bottom	29-30	32	-2.5	35.01	31.18	27.42	5.33	28.22	11.04	0	3.5	0	3.35		7.59	8.33	31.6323	-24.0423			46.1105	-64.1507	4.6	0.653799	13	0.023284
07-008	Atlantic Maritime	0-1	249	32.41	44.87	4.73	57.92	9.94	30.94	4.08	0	2.84		(x-3)-(x-2)	Bottom	30-31	32	-1.5	5.03	47.78	41.93	8.49	62.11	17.81	0.31	5.66	0	5.27		-36.9	8.33	48.5284	-85.4284			45.9311	-64.3682	3	1.48072	9	0.141086
07-010	Atlantic Maritime	0-1	505.06	38.76	21	5.31	33.05	10.97	55.35	4.85	0	2.52		(x-3)-(x-2)	Bottom (P1)	31-32	32	-0.5	97.39	18.75	51.48	4.29	49.11	8.46	2.35	2.04	0	1.88		45.91	45.91	19.2345	26.6755			44.9531	-64.5634	14.6	22.0331	190	0.043166
07-011	Atlantic Maritime	0-1	753.84	54.6	51.83	4.96	49.7	9.98	103.31	7.51	1.11	3.03		(x-3)-(x-2)	Bottom	40-41	32	8.5	24.13	26.07	39.94	4.7	47.83	9.52	0	2.86	0.59	2.88		-15.81	8.33	26.4903	-42.3003			44.3733	-64.5743	6.2	1.03805	74	0.253491
07-013	Atlantic Maritime	0-1	438.54	54.25	14.91	8.23	18.15	23.45	28.86	5.87	0	4.85		(x-3)-(x-2)	Bottom	30-31	32	-1.5	0	44.06	11.29	8.36	36.88	23.86	0	5.05	0	4.95		-11.29	8.33	44.8461	-56.1361			44.8458	-64.5985	2.05	0.142108	219	0.070573
07-019	Atlantic Maritime	0-1	2509.75	153.54	44	10.09	68.6	16.12	162.51	12.58	0	5.2		(x-3)-(x-2)	Bottom	43.5-44.5	32	12	23.12	50.11	35.61	10.54	50.62	18.25	0	6.58	0	5.79		-12.49	8.33	51.2065	-63.6965			44.5255	-64.5491	44	2.79324	76	0.041338
07-022	Atlantic Maritime	0-1	674.84	96.98	29.76	14.53	99.69	25.76	105.98	13.45	0	8.55		(x-3)-(x-2)	Bottom	29.5-30.5	32	-2	0	31.39	10.25	6.43	40.2	11.46	0	4	0	3.46		-10.25	8.33	32.0418	-42.2918			44.4965	-65.4712	6.3	14.5354	144	0.001754
07-025	Atlantic Maritime	0-1	711.54	92.18	4.92	13.57	31.94	39.63	84.16	11.49	0	8.05		(x-3)-(x-2)	Bottom	31.5-32.5	32	0	0	41.64	3.87	7.71	49.32	22.9	13.65	5.29	0	4.67		-3.87	8.33	42.3478	-46.2178			43.6395	-65.7072	4.9	5.58161	31	0.011485
07-029	Atlantic Maritime	0-1	537.02	49.15	57.95	5.89	69.62	12.37	31.91	4.81	0	3.55		(x-3)-(x-2)	Bottom	29-30	32	-2.5	0	36.82	19.95	6.36	53.67	14.09	0	4.49	0	4.17		-19.95	8.33	37.3653	-57.3153			45.4157	-65.9675	12	0.24665	37	0.516125
07-035	Atlantic Maritime	0-1	1262.52	100.25	12.78	9.03	38.44	18.82	79.7	9.62	4.92	6.24		(x-3)-(x-2)	Bottom	32-33	32	0.5	57.06	55.65	11.36	9.48	29.94	20	0	6.81	6.63	6.47		45.7	45.7	56.4517	-10.7517			46.8528	-66.3616	5.8	0.750216	323	0.032387
07-037	Atlantic Maritime	0-1	571.52	41.85	71.52	5.11	80.9	13.45	105.35	6.46	2.38	2.82		(x-3)-(x-2)	Bottom	32-33	32	0.5	150.69	22.17	120.85	5.03	139.01	12.21	0	2	0	2.21		29.84	29.84	22.7335	7.10655			45.4489	-66.4707	4	0.724355	174	0.014336
07-046	Atlantic Maritime	0-1	1752.71	104.27	21.03	6.68	47.06	18.92	210.7	12.21	4.67	4.11		(x-3)-(x-2)	Bottom	36-37	32	4.5	0	28.5	20.64	5.64	47.16	16.17	0	3.28	0	3.3		-20.64	8.33	29.0527	-49.6927			45.5864	-67.004	13.5	41.6461	115	0.070571
07-052	Atlantic Maritime	0-1	477.63	39.25	43.4	5.85	30.28	11.71	85.91	6.48	0	2.71		(x-3)-(x-2)	Bottom	31-32	32	0.5	41.62	24.93	58.24	6.28	67.55	12.83	0	3.19	0	2.65		-16.62	8.33	25.7088	-42.3288			45.9373	-67.1587	7.15	2.10186	141	0.100339
07-055	Atlantic Maritime	0-1	561.71	80.71	12.91	10.83	39.87	23.51	34.2	9.21	0	7.19		(x-3)-(x-2)	Bottom	45-46	32	13.5	10.7	49.51	11.89	8.33	31.2	17.87	1.68	6.03	0	5.45		-1.19	8.33	50.2059	-51.3959			46.9211	-67.6554	1.81	0.154375	193	0.390196
07-236	Atlantic Maritime	0-1	1071.6	69.74	159.29	6.95	165.72	13.29	29.64	3.94	0	2.96		(x-3)-(x-2)	Bottom	33-34	32	1.5	71.32	20.46	64.29	4.02	71.16	8.22	102.99	6.88	0.45	2.14		7.03	8.33	20.8512	-13.8212			44.6429	-63.702	15	0.393824	72	0.540095
07-241	Atlantic Maritime	0-1	587.67	44.4	39.89	5.02	66.89	9.57	37	4.36	0	2.86		(x-3)-(x-2)	Bottom	36-37	32	4.5	9.61	49.26	10.4	9.68	50.05	17.04	0	6.42	0	5.42		-0.79	8.33	50.2021	-50.9921			44.6556	-63.47	8.84	0.923918	32	0.906322
07-242	Atlantic Maritime	0-1	1418.26	80.67	58.09	4.7	70.56	9.6	102.22	6.62	0.06	2.06		(x-3)-(x-2)	Bottom	38-39	32	6.5	29.31	22.2	19.34	5.33	26.61	11.24	2.98	2.82	0	2.34		9.97	9.97	22.8309	-12.8609			44.702	-63.5046	5.62	0.791676	68	0.74721
07-245	Atlantic Maritime	0-1	543.53	37.92	47.6	4.65	49.25	11.15	113.87	7.23	0.12	2.09		(x-3)-(x-2)	Bottom	36-37	32	4.5	16.01	22.98	37.53	5.91	23.06	11.98	0	3.01	0	2.59		-21.52	8.33	23.7278	-45.2478			45.3768	-61.9485	21.41	0.601617	68	0.127112
07-248	Atlantic Maritime	0-1	425.16	48.28	7.58	7.12	26.9	12.71	87.47	8.13	1.44	4.1		(x-3)-(x-2)	Bottom	30.5-31.5	32	-1	22.43	41.83	18.66	8.37	34.3	14.51	0	5.24	0	4.6		3.77	8.33	42.6592	-38.8892			45.5225	-61.5607	4.05	0.348078	136	0.034769
07-249	Atlantic Maritime	0-1	124.17	16.15	22.35	3.21	24.39	6.55	7.54	1.9	0	1.42		(x-3)-(x-2)	Bottom	31-32	32	-0.5	21.1	10.74	19.97	2.51	21.81	6.13	2.83	1.36	0	1.18		1.13	8.33	11.0294	-9.8994			45.6222	-61.3621	1.04	0.104474	3	0.168199
07-251	Atlantic Maritime	0-1	155.49	73.1	4.75	12.69	53.97	22.27	0	8.32	0	7.59		(x-3)-(x-2)	Bottom	42.5-43.5	32	11	34.95	14.16	41.05	2.85	46.61	5.29	2.02	1.62	0.03	1.56		-6.1	8.33	14.444	-20.544			46.1702	-60.0147	15.27	0.177268	5	0.193366
07-252	Atlantic Maritime	0-1	1193.12	90.96	33.79	10.01	72.54	18.19	84.26	9.36	3.8	5.49		(x-3)-(x-2)	Bottom	32-33	32	0.5	14.57	48.58	29.27	9.95	64.29	17.34	0	6.22	0.28	5.48		-14.7	8.33	49.5885	-64.2885			46.1712	-60.3183	12.26	0.436753	10	0.028571
13-516	Boreal Cordillera	0-1	752.54	56.53	122.23	6.93	125.07	13.54	30.5	5.22	0	3.47		(x-3)-(x-2)	Bottom	19-20	22	-2.5	75.04	23.09	65.61	4.42	81	9.3	0	2.8	0	2.47		9.43	9.43	23.5092	-14.0792			59.3005	-129.276	41	1.72525	758	0.021341
13-518	Boreal Cordillera	0-1	1042.69	105.15	17.83	12.67	77.66	28.79	85.23	14.2	0	8.15		(x-3)-(x-2)	Bottom	19-20	22	-2.5	68.86	72.78	14.36	11.85	66.18	26.1	7.01	10.26	0	7.81		54.5	54.5	73.7384	-19.2384			60.0636	-128.699	5.6	0.190495	692	0.738562
13-520	Boreal Cordillera	0-1	3837.21	252.74	19.52	15.55	70.12	33.52	10.28	13.04	0	10.54		(x-3)-(x-2)	Bottom	19-20	22	-2.5	494.21	89.69	26.02	12.81	89.8	29.25	0	10.88	0	8.54		468.19	468.19	90.6002	377.59			60.1254	-130.927	10	0.204926	995	0.008924
13-525	Boreal Cordillera	0-1	72.99	19.56	29.93	3.31	37.98	7.11	14.7	3.06	0	1.97		(x-3)-(x-2)	Bottom	19-20	22	-2.5	2.23	15.98	25.87	2.84	38.46	6.24	0	2.1	0	1.78		-23.64	8.33	16.2304	-39.8704			60.4799	-137.011	3.3	74.1761	623	0.003334
13-562	Boreal Cordillera	0-1	501.23	122.36	31.49	17.51	52.37	57.49	136.72	18.53	0	12.57		(x-3)-(x-2)	Bottom	19-20	22	-2.5	0	73.18	6.89	11.71	38.65	38.69	0.82	9.05	1.49	8.28		-6.89	8.33	74.111	-81.001			60.0804	-128.746	7	0.233236	698	0.104502
13-563	Boreal Cordillera	0-1	584.04	150.43	8.32	22.7	127.88	51.91	0	19.01	0	14.61		(x-3)-(x-2)	Bottom	19-20	22	-2.5	157.25	109.86	35.48	17.93	110.16	40.15	0	15.08	0	11.8		121.77	121.77	111.314	10.4565			61.4557	-129.745	3	0.123808	831	0.085851
13-565	Boreal Cordillera	0-1	1016.27	108.78	12.43	12.97	98.81	30.47	0	11.43	0	9.21		(x-4)-(x-3)	Bottom	18-19	22	-3.5	0	58.27	23.59	9.43	62.57	21.34	2.41	8.43	0	6.63		-23.59	8.33	59.0281	-82.6181			61.935	-132.522	21	1.1402	797	0.036933
13-566	Boreal Cordillera	0-1	1100.62	91.37	37.39	9.2	55.22	19.15	58.44	9.53	0	6.08		(x-3)-(x-2)	Bottom	19-20	22	-2.5	24.45	33.75	34.06	5.85	61.11	13.38	0	4.76	0	3.74		-9.61	8.33	34.2532	-43.8632			62.1919	-133.474	21	0.363682	773	0.071805
13-568	Boreal Cordillera	0-1	100.7	41.23	74.46	7.34	90.06	15.89	25.76	6.41	0	4.32		(x-3)-(x-2)	Bottom	20-21	22	-1.5	11.31	23.71	48.85	4.36	66.28	9.51	0	3.05	0	2.64		-37.54	8.33	24.1075	-61.6475			63.3616	-136.062	38	43.3059	675	0.001542
13-569	Boreal Cordillera	0-1	940.97	71.84	108.7	7.96	107.41	15.81	10.57	5.86	0	4.36		(x-3)-(x-2)	Bottom	19-20	22	-2.5	30.61	29.95	49.62	5.48	69.24	11.89	3.63	4.24	0	3.32		-19.01	8.33	30.4472	-49.4572			63.6871	-136.154	34	4.03175	680	0.000233
04-623	Boreal Plains	0-1	572.45	83.55	23.82	10.44	92.9	24.05	92.66	11.69	0	7.44		(x-3)-(x-2)	Bottom	25-26	22	3.5	15.96	27.15	18.05	4.61	52.57	11.6	0	3.49	0	3.15		-2.09	8.33	27.5386	-29.6286			58.823	-122.901	1.2	0.62639	394	0.036159
04-624	Boreal Plains	0-1	487.12	50.26	15.51	6.21	46.13	14.82	175.17	11.61	0	4.1		(x-3)-(x-2)	Bottom	21-22	22	-0.5	3.63	39.91	19.85	6.82	60.25	16.34	9.99	5.28	0	4.62		-16.22	8.33	40.4885	-56.7085			58.6239	-122.694	1.8	0.193301	481	0.075556
09-287	Boreal Plains	0-1	229.72	83.32	29.93	15.02	91.1	27.36	19.66	10.34	0	8.63		(x-3)-(x-2)	Bottom	48-49	47	1.5	24.21	62.96	13.46	12.55	46.02	22.16	0	7.97	0.37	7.28		10.75	10.75	64.1986	-53.4486			52.645	-103.307	3.2	0.255697	480	0.812256
09-370	Boreal Plains	0-1	636.6	97.72	20.91	15.53	96.64	28.36	94.03	13.72	0.91	9.15		(x-3)-(x-2)	Bottom	51-52	47	4.5	19.61	40.21	23.17	7.94	63.67	14.44	0	4.94	0	4.53		-3.56	8.33	40.9864	-44.5464			53.4494	-116.78	5	3.64794	977	0.006309
09-372	Boreal Plains	0-1	766.97	141.57	2.81	22.56	89.84	40.84	99.86	18.47	0	13.17		(x-3)-(x-2)	Bottom	51-52	47	4.5	0	78.59	0	15.44	110.18	28.74	4.22	10.33	0	8.63		0	8.33	80.0923	-80.0923			53.683	-116.27	6.4	0.51751	870	0.238119
09-375	Boreal Plains	0-1	9.17	45.85	26.9	9.26	74.68	17.09	0	6.13	0	5.3		(x-3)-(x-2)	Bottom	45-46	47	-1.5	76.11	39.21	11.37	6.77	32.92	11.87	10.86	4.68	0	3.98		64.74	64.74	39.7902	24.9498			53.9397	-114.321	17	12.451	669	0.346612
09-376	Boreal Plains	0-1	263.08	73.56	25.82	12.99	107.39	24.14	22.71	9.11	0	7.56		(x-3)-(x-2)	Bottom	50-51	47	3.5	42.19	35.64	40.42	7.07	86.68	13.27	0	4.5	0	3.94		1.77	8.33	36.3345	-34.5645			54.0175	-114.349	10	0.439988	645	0.246488
09-380	Boreal Plains	0-1	368.34	169.48	0	29.09	94.75	50.82	106.67	22.7	0	17.6		(x-3)-(x-2)	Bottom	48-49	47	1.5	0	59.19	11.64	12.06	61.96	21.69	10.39	8.18	0	6.67		-11.64	8.33	60.4061	-72.0461			55.0614	-114.017	4.4	0.790629	612	0.147746
09-381	Boreal Plains	0-1	79.04	41.63	28.7	7.77	47.26	13.87	25.93	5.88	0	4.35		(x-3)-(x-2)	Bottom	46-47	47	-0.5	9.63	24.35	27.38	4.92	42.17	9.07	0	3	0	2.76		-17.75	8.33	24.8421	-42.5921			55.6231	-116.744	4.6	45.114	622	0.143828
09-403	Boreal Plains	0-1	1120.15	119.51	31.05	14.48	64.89	31.8	81.58	13.75	0	9.48		(x-3)-(x-2)	Bottom	47-48	47	0.5	0	23.06	25.69	3.92	27.02	8.07	0	2.94	0	2.42		-25.69	8.33	23.3908	-49.0808			53.5441	-114.582	10	77.3131	725	0.40746
09-418	Boreal Plains	0-1	552.28	95.49	0	15.28	43.75	27.68	0.95	10.45	0	9.06		(x-3)-(x-2)	Bottom	51-52	47	4.5	23.4	60.86	8.75	12.04	75.23	21.71	0	7.76	0	7.04		14.65	14.65	62.0395	-47.3895			52.6716	-105.272	7.1	0.817934	536	0.65383
09-423	Boreal Plains	0-1	302.15	40.62	8.96	6.04	30.89	10.52	10.91	4.17	0	3.62		(x-3)-(x-2)	Bottom	57-58	47	10.5	15.65	41.74	24.04	8.48	69.23	15.44	0	5.28	0	4.7		-8.39	8.33	42.5927	-50.9827			53.1837	-106.845	20.5	1.09518	535	0.460128
09-603	Boreal Plains	0-1	508.59	96.64	23.94	13.86	51.81	31.15	35.49	11.81	0	9.56		(x-3)-(x-2)	Bottom	43-44	47	-3.5	11.35	46.81	12.79	7.97	103.96	20.2	0	5.85	0	5.42		-1.44	8.33	47.4836	-48.9236			57.2921	-111.239	1.6	5.11506	329	0.010271
09-604	Boreal Plains	0-1	127.66	23.01	44.07	3.78	70.43	8.77	27.7	3.24	0	2.24		(x-3)-(x-2)	Bottom	39-40	47	-7.5	15.49	16.37	31.97	2.96	43.17	6.59	2.16	1.97	0	1.74		-16.48	8.33	16.6355	-33.1155			55.2176	-119.091	3.5	7.98332	711	0.688483
09-608	Boreal Plains	0-1	108.01	40.35	31.3	6.14	59.41	14.25	14.47	4.96	2.12	4.13		(x-3)-(x-2)	Bottom	44-45	47	-2.5	30	27.61	27.95	4.81	73.83	12.33	3.71	3.54	0	3.1		2.05	8.33	28.0258	-25.9758			56.2409	-117.735	2.6	48.5837	644	0.345653
06-066	Boreal Shield	0-1	598.71	53.48	27.89	6.99	59.06	12.63	140.46	10.49	0	4.06		(x-3)-(x-2)	Bottom	39-40	32	7.5	0	52.16	13.42	10.4	73.16	18.52	0	6.6	3.09	6.19		-13.42	8.33	53.1867	-66.6067			49.8695	-68.7328	13	0.416603	289	0.017315
06-071	Boreal Shield	0-1	2365	139.42	16.67	8.56	20.17	24.06	213.14	13.08	2.7	5.1		(x-3)-(x-2)	Bottom	36-37	32	4.5	0	60.43	26.77	12.13	58.58	34.34	0	7.44	0	7.21		-26.77	8.33	61.6354	-88.4054			50.3653	-68.8189	17	1.87556	548	0.117976
06-080	Boreal Shield	0-1	922.2	64.16	38.07	6.38	32.32	17.58	92.25	7	0	3.71		(x-3)-(x-2)	Bottom	30-31	32	-0.5	0	33.75	17.4	6.69	11.64	18.99	0	4.02	0	3.91		-17.4	8.33	34.4067	-51.8067			48.2483	-69.6378	11	0.159765	106	0.013492
06-095	Boreal Shield	0-1	462.6	38.04	13.43	3.78	22.12	7.68	19.83	3.43	0	2.47		(x-3)-(x-2)	Bottom	42-43	32	10.5	0	45.15	17.51	7.62	42.31	16.37	5.5	5.81	0	5.11		-17.51	8.33	45.7885	-63.2985			48.2313	-71.2511	7	0.838487	339	0.046047
06-101	Boreal Shield	0-1	1971.99	120.05	15.06	8.04	40.02	22.62	73.23	7.34	4.12	4.83		(x-3)-(x-2)	Bottom	36-37	32	4.5	39.59	48.12	3.46	8.87	16.78	26.02	0	5.51	0	5.23		36.13	36.13	48.9307	-12.8007			50.4187	-71.7342	21	14.1845	528	0.040893
06-103	Boreal Shield	0-1	283.99	45.79	31.48	9.39	54.45	19.86	16.06	5.33	0	4.33		(x-3)-(x-2)	Bottom (P1)	32-33	32	0.5	167.65	27.42	35.09	5.98	37.91	14.91	36.93	4.42	0	2.68		132.56	132.56	28.0645	104.495			48.3951	-71.7737	34	0.720739	156	0.329311
06-125	Boreal Shield	0-1	509.51	49.74	5.74	5.56	36.55	12.67	57.92	6.37	0.73	3.77		(x-3)-(x-2)	Bottom	38.5-39.5	32	7	0	72.1	12.45	12.04	47.93	25.98	0	8.84	0	7.93		-12.45	8.33	73.0984	-85.5484			45.9927	-74.0093	11.7	0.180495	359	0.002448
06-126	Boreal Shield	0-1	973.82	66.46	19.61	5.75	46.45	16.44	58.23	5.74	2.79	3.42		(x-3)-(x-2)	Bottom	36-37	32	4.5	9.3	39.53	32.61	7.63	24.7	21.29	0.96	4.55	0	4.3		-23.31	8.33	40.2596	-63.5696			48.9933	-74.0294	17	0.554081	445	0.188115
06-128	Boreal Shield	0-1	1263.91	98.8	22.65	8.74	39.63	18.09	73.46	8.74	5.5	5.83		(x-3)-(x-2)	Bottom	46.5-47.5	32	15	0	48.9	10.05	8.39	39.72	18.13	0	5.82	0	5.53		-10.05	8.33	49.6145	-59.6645			45.8623	-74.1157	18.5	0.171636	298	0.482585
06-136	Boreal Shield	0-1	364.01	37.71	24.09	5.36	57.06	10.03	14.44	3.81	0.66	3		(x-3)-(x-2)	Bottom	29-30	32	-2.5	17.14	26.61	31.24	5.16	50.01	9.66	0	3.19	0	2.87		-14.1	8.33	27.1057	-41.2057			46.7196	-75.4373	13	0.614648	218	0.310524
06-137	Boreal Shield	0-1	649.07	43.91	45.47	4.45	53.95	11.76	28.86	3.3	0	2.37		(x-3)-(x-2)	Bottom	34-35	32	2.5	604.94	41.88	36.06	4.18	37.54	11.47	23.74	3.09	0	2.37		568.88	568.88	42.0881	526.792			46.4503	-75.5511	40	16.7168	209	0.051514
06-161	Boreal Shield	0-1	368.46	42.91	22.19	6.04	32.67	16.91	61.98	5.8	3.53	3.64		(x-3)-(x-2)	Bottom	38-39	32	6.5	13.16	17.23	8.88	3.35	27.89	9.76	0	1.99	1.05	1.99		4.28	8.33	17.5526	-13.2726			45.191	-77.6511	16	2.28695	355	0.146507
06-199	Boreal Shield	0-1	615.24	70.65	28.79	10.35	60.58	28.99	41.95	7.79	0	6.05		(x-3)-(x-2)	Bottom	31-32	32	-0.5	23.88	21	39.62	4.24	52.67	11.7	0	2.42	0	2.36		-15.74	8.33	21.4238	-37.1638			49.1091	-81.0321	2.3	1.8049	245	0.405692
06-200	Boreal Shield	0-1	1099.92	106.05	20.58	14.01	116.09	41.54	104.53	11.92	0	8.24		(x-3)-(x-2)	Bottom	34.5-35.5	32	3	0	121.26	2.3	23.57	61.59	68.23	0	15.15	3.83	14.03		-2.3	8.33	123.529	-125.829			48.2383	-81.0408	2.5	0.139304	337	0.247186
06-217	Boreal Shield	0-1	1887.52	145.66	4.11	15.66	83.2	27.94	92.87	13.54	0	9.1		(x-3)-(x-2)	Bottom	31.5-32.5	32	0	0	71.82	2.76	14.81	69.68	26	0	9.8	0	8.11		-2.76	8.33	73.3311	-76.0911			47.8365	-83.2864	28	16.5629	428	0.014231
06-221	Boreal Shield	0-1	1457.76	131.04	12.98	15.68	42.71	27.34	96.25	13.47	0.7	9.16		(x-3)-(x-2)	Bottom	39-40	32	7.5	0	85.81	3.27	17.49	103.21	30.72	0	10.96	0	9.92		-3.27	8.33	87.5743	-90.8443			47.8352	-83.3482	7	0.293141	431	0.115583
06-255	Boreal Shield	0-1	1831.23	110.47	50.97	4.72	56.49	9.7	112.01	7.8	3.14	3.15		(x-3)-(x-2)	Bottom	36-37	32	4.5	36.21	24.04	50.11	4.44	55.72	9.2	0	2.79	0	2.66		-13.9	8.33	24.4466	-38.3466			47.4644	-52.9769	15	0.547495	156	0.177547
06-262	Boreal Shield	0-1	966.05	60.37	309.19	10.4	326.84	18.48	46.18	4.21	4.95	3		(x-3)-(x-2)	Bottom	44-45	32	12.5	230.32	17.93	180.57	5.59	173.82	9.2	0.62	1.23	0	1.39		49.75	49.75	18.7812	30.9688			47.1298	-55.5146	9	0.298073	19	0.118056
06-272	Boreal Shield	0-1	1489.75	113.78	25.64	11.46	86.29	21.03	207.99	16.68	0	6.84		(x-3)-(x-2)	Bottom	30-31	32	-0.5	0	47.9	32.46	9.46	52.75	16.37	1.68	6.15	0	5.4		-32.46	8.33	48.8252	-81.2852			49.4531	-92.0831	16.3	0.692448	449	0.074219
06-274	Boreal Shield	0-1	532.1	49.77	29.12	6.38	47.68	11.53	92.56	7.99	0	3.72		(x-3)-(x-2)	Bottom	32-33	32	0.5	21.17	41.34	23.69	8.32	55.91	14.88	0	5.12	0	4.66		-2.52	8.33	42.1689	-44.6889			49.7877	-94.4638	8.6	0.902346	346	0.611391
06-295	Boreal Shield	0-1	721.38	59.46	57.28	7.47	83.46	13.68	116.14	9.37	0	4.12		(x-3)-(x-2)	Bottom	42-43	32	10.5	40.88	27.94	59.27	5.65	78.04	10.38	0.58	3.36	0	3.03		-18.39	8.33	28.5055	-46.8955			56.6393	-100.233	24.3	66.3508	265	0.002908
06-313	Boreal Shield	0-1	1464.96	100.77	28	6.69	60.63	15.19	114.09	10.39	0	4.42		(x-3)-(x-2)	Bottom	39-40	32	7.5	19.05	26.29	39.82	4.7	47.25	9.82	0	3.13	0	2.98		-20.77	8.33	26.7068	-47.4768			49.338	-90.2715	22.5	50.5082	466	0.039855
06-314	Boreal Shield	0-1	1459.43	81.31	60.23	3.89	70.2	7.93	118.79	7.05	0.04	1.69		(x-3)-(x-2)	Bottom	49-50	32	17.5	28.23	12.14	40.6	3.13	39.71	6.07	1.7	1.47	0	1.33		-12.37	8.33	12.537	-24.907			50.4077	-87.0801	41.2	41.6477	293	0.004304
08-097	Mixedwood Plains	0-1	143.75	70.9	22.85	11.79	63.8	21.98	30.61	9.21	0.65	7.2		(x-3)-(x-2)	Bottom	44-45	32	12.5	20.91	27.27	27.2	5.41	46.51	10.01	0	3.27	0	3.01		-6.29	8.33	27.8015	-34.0915			46.7496	-71.3923	5.5	0.696418	41	0.767011
08-120	Mixedwood Plains	0-1	435.07	50.26	23.6	7.17	21.23	19.96	1.83	4.58	1.78	4.33		(x-3)-(x-2)	Bottom	35-36	32	3.5	36.83	17.59	17.87	3.23	17.12	8.86	0	1.95	0	1.86		18.96	18.96	17.8841	1.0759			46.7962	-72.5235	21	0.711466	148	0.295821
08-144	Mixedwood Plains	0-1	727.15	44.72	61.63	3.59	77.76	6.92	51.09	3.92	0	1.76		(x-3)-(x-2)	Bottom	30-31	32	-1.5	33.32	16.09	47.91	3.43	62.96	6.59	0	1.83	0	1.74		-14.59	8.33	16.4515	-31.0415			44.5446	-76.0473	30	27.4792	86	0.203111
08-145	Mixedwood Plains	0-1	2387.83	137.53	1.1	7.58	39.1	13.71	9.75	4.9	0	4.2		(x-3)-(x-2)	Bottom	31-32	32	-0.5	22.03	57.29	8.43	11.61	57.28	21.6	0.7	7.36	3.41	6.48		13.6	13.6	58.4546	-44.8546			44.419	-76.3999	14	0.154103	136	0.347239
08-148	Mixedwood Plains	0-1	2624.26	175.9	82.43	11.43	116.87	23.65	23.15	8.1	0	6.95		(x-3)-(x-2)	Bottom	42-43	32	10.5	103.14	58.78	29.75	9.85	80.09	21.81	0	6.94	0	6.45		73.39	73.39	59.5996	13.7904			44.4942	-76.4138	43	0.840082	121	0.039794
08-150	Mixedwood Plains	0-1	2875.23	173.84	30.32	11.54	103.38	21.75	32.13	8.2	0	6.35		(x-3)-(x-2)	Bottom	35-36	32	3.5	0	40.7	14.23	8.27	46.11	15.07	0	5.07	0	4.49		-14.23	8.33	41.5317	-55.7617			44.415	-76.4295	25	0.56006	126	0.196766
08-151	Mixedwood Plains	0-1	2076.34	120.76	16.38	6.11	47.38	11.33	198.76	12.3	0.09	3.58		(x-3)-(x-2)	Bottom	39-40	32	7.5	4.85	24.88	19.51	5.08	25.27	8.97	0	3.02	0	2.68		-14.66	8.33	25.3933	-40.0533			44.5776	-76.4408	41	11.0051	132	0.050864
08-152	Mixedwood Plains	0-1	715.34	69.95	21.71	9.07	52.33	25.85	43.44	7.28	0	5.41		(x-3)-(x-2)	Bottom	29-30	32	-2.5	29.35	69.19	15.63	13.29	60.53	38.37	15.99	8.68	3.88	7.76		13.72	13.72	70.4548	-56.7348			44.6035	-76.4679	6	0.325842	122	0.010617
08-154	Mixedwood Plains	0-1	1331.62	118.92	31.53	19.03	44.04	39.82	71.9	12.62	0	8.93		(x-3)-(x-2)	Bottom	33-34	32	1.5	0	44.9	22.21	11.35	51.73	24.68	0	6.18	10.9	5.73		-22.21	8.33	46.3123	-68.5223			45.8449	-76.6539	21	0.122664	137	0
08-155	Mixedwood Plains	0-1	782.74	62.5	4.07	6.06	20.49	10.72	55.96	6.23	0	3.72		(x-3)-(x-2)	Bottom	33-34	32	1.5	38.03	52.02	1.34	9.2	27.41	15.8	0	5.89	0	5.57		36.69	36.69	52.8273	-16.1373			44.3919	-76.8134	2.3	6.34829	142	0.257341
08-157	Mixedwood Plains	0-1	363.06	70.89	8.67	12.27	69.97	22.86	52.23	9.63	0	6.84		(x-3)-(x-2)	Bottom	31-32	32	-0.5	0	33.13	4.04	6.99	30.97	12.34	1.65	4.34	0	3.85		-4.04	8.33	33.8594	-37.8994			44.4091	-76.8573	1.3	6.18645	137	0.299892
08-160	Mixedwood Plains	0-1	692.72	63.94	80.05	10.67	81.88	21.79	54.48	7.37	0	4.9		(x-3)-(x-2)	Bottom (P1)	33-34	32	1.5	44.14	21.61	49.01	5.21	56.65	10.95	0.42	2.68	0	2.23		-4.87	8.33	22.2292	-27.0992			44.4727	-77.2898	13.5	5.85965	139	0.055364
08-162	Mixedwood Plains	0-1	185.46	23.72	3.62	3.63	21.48	6.58	13.88	2.82	0	2.01		(x-3)-(x-2)	Bottom	30-31	32	-1.5	28.73	18.76	7.48	3.74	22.85	6.67	5.96	2.56	0	2.06		21.25	21.25	19.1292	2.12083			44.0461	-77.8249	8.1	0.69258	173	0.571866
08-163	Mixedwood Plains	0-1	454.52	61.66	20.41	10.19	36.4	17.5	46.79	8.04	0	5.7		(x-3)-(x-2)	Bottom	30-31	32	-1.5	141.56	29.51	19.3	5.14	31.47	9.34	58.75	5.28	0	2.89		122.26	122.26	29.9543	92.3057			44.3801	-77.8149	7	7.51505	183	0.221596
08-164	Mixedwood Plains	0-1	500.25	85.61	12.86	14.17	56.86	24.32	29.55	10.15	0	8.29		(x-3)-(x-2)	Bottom	29-30	32	-2.5	0	52.54	4.15	10.51	58.23	19.82	6.44	7.09	0	6.1		-4.15	8.33	53.5809	-57.7309			44.2746	-77.9106	6.3	0.180712	207	0.407166
08-166	Mixedwood Plains	0-1	155.37	62.44	13.74	11.49	82.25	20.62	51.32	9.26	0	6.49		(x-3)-(x-2)	Bottom	32-33	32	0.5	42.45	32.49	24.23	6.55	47.02	12.02	0.36	4	0	3.58		18.22	18.22	33.1437	-14.9237			44.1779	-78.1791	6	99.6617	187	0.220027
08-168	Mixedwood Plains	0-1	594.38	55.53	23.89	7.29	65.09	14	130.08	9.82	0	4.17		(x-3)-(x-2)	Bottom	33-34	32	1.5	31.72	40.4	29.6	7.98	59.2	14.57	16.28	5.5	0	4.35		2.12	8.33	41.1806	-39.0606			44.4743	-78.6873	9.5	46.3756	247	0.206263
08-169	Mixedwood Plains	0-1	347.9	63.11	10.19	10.31	53.96	18.63	25.56	7.81	0	5.75		(x-3)-(x-2)	Bottom	35-36	32	3.5	78.73	40.06	8.82	7.81	53.7	14.48	67.77	7.25	0	4.4		69.91	69.91	40.8142	29.0958			44.1915	-78.8099	5	69.4162	249	0.480696
08-170	Mixedwood Plains	0-1	1349.91	99.96	31.98	10.39	50.08	18.05	105.82	10.78	0	5.68		(x-3)-(x-2)	Bottom	44-45	32	12.5	0	54.94	0	11.06	46.33	20.3	0	7.26	0	6.21		0	8.33	56.0422	-56.0422			44.7403	-78.9125	5.1	9.79056	268	0.026636
08-179	Mixedwood Plains	0-1	483.9	152.57	0	21.64	136.5	49.96	9.87	17.78	6.1	15.7		(x-3)-(x-2)	Bottom	37-38	32	5.5	23.73	29.89	16.55	5.05	48.9	10.99	2.29	3.44	0	3.3		7.18	8.33	30.3136	-23.1336			43.949	-79.4362	17	0.593466	295	0.672519
08-181	Mixedwood Plains	0-1	770.43	74.98	21.97	8.65	38.73	18.09	39.28	7.58	2.68	5.84		(x-3)-(x-2)	Bottom	40-41	32	8.5	36.07	38.02	15.48	6.15	54.45	13.48	9.03	4.54	0	4.09		20.59	20.59	38.5142	-17.9242			44.6035	-79.5066	9.3	5.71369	254	0.367174
08-185	Mixedwood Plains	0-1	825.01	80.41	4.64	12.81	2.95	27.49	47.66	8.95	6.58	6.19		(x-3)-(x-2)	Bottom	40-41	32	8.5	0	25.86	3.16	6.45	8.9	13.85	0	3.42	0	2.91		-3.16	8.33	26.6522	-29.8122			44.6082	-79.803	2.2	3.20337	222	0.268782
08-186	Mixedwood Plains	0-1	73.7	28.54	35.57	5.41	55.47	9.98	0.45	3.43	0	3.05		(x-3)-(x-2)	Bottom	41-42	32	10.5	33.45	14.21	36.32	2.8	45.32	5.3	0.13	1.62	0	1.57		-2.87	8.33	14.4832	-17.3532			43.1053	-79.8509	6.2	1.88968	199	0.778232
08-188	Mixedwood Plains	0-1	308.43	49.31	27.14	8.34	55.14	15.15	7.71	5.74	0	4.68		(x-3)-(x-2)	Bottom	34-35	32	2.5	60.69	19.8	31.69	3.79	40.38	6.96	11.68	2.59	0	2.03		29	29	20.1595	8.84053			43.6212	-80.0481	6.4	0.266177	347	0.579305
08-189	Mixedwood Plains	0-1	429.34	128.62	13.64	19.01	146.33	44.31	111.27	19.44	0.73	13.21		(x-3)-(x-2)	Bottom	45-46	32	13.5	0	159.61	22.61	27	117.87	59.13	0	19.01	0	18.04		-22.61	8.33	161.878	-184.488			44.1676	-81.3111	2	0.25076	281	0.240475
08-191	Mixedwood Plains	0-1	55.8	17.18	29.59	3	30.4	6.16	2.75	2.07	0	1.83		(x-3)-(x-2)	Bottom	34-35	32	2.5	11.25	15.76	21.07	2.76	30.24	5.88	7.32	2.1	0	1.66		-9.82	8.33	15.9998	-25.8198			43.3534	-80.5373	1.5	0.161311	318	0.718435
08-193	Mixedwood Plains	0-1	622.1	81.9	18.29	12.69	53.55	36.15	165.43	13.44	0	7.42		(x-3)-(x-2)	Bottom	40-41	32	8.5	49.33	180.9	0	33.71	67.85	100.2	25.99	22.63	0	20.29		49.33	49.33	184.014	-134.684			44.2053	-81.0527	8	0.232643	293	0.627743
08-197	Mixedwood Plains	0-1	585.39	47.05	8.68	4.58	23.72	9.54	4.58	3.36	1.31	3.04		(x-3)-(x-2)	Bottom	30.5-31.5	32	-1	4.26	21.92	6.96	3.93	21.63	8.21	0	2.74	0	2.48		-2.7	8.33	22.2695	-24.9695			44.2583	-80.9653	10.1	0.113732	299	0.20042
08-204	Mixedwood Plains	0-1	1421.74	140.89	0.79	18.94	80.27	34.55	26.72	13.74	0	11.02		(x-3)-(x-2)	Bottom	42-43	32	10.5	22.6	122.67	2.59	24.86	95.83	43.39	18.66	17.14	3.73	14.56		20.01	20.01	125.164	-105.154			45.2152	-81.4885	4.1	0.085737	213	0.023065
08-205	Mixedwood Plains	0-1	3388.92	191.52	18.9	9.12	41.31	25.67	201.13	13.04	0	5.46		(x-3)-(x-2)	Bottom	31-32	32	-0.5	28.73	22.39	1.89	4.17	25.72	12.32	1.82	2.8	0	2.51		26.84	26.84	22.775	4.06499			45.205	-81.3269	31	2.24816	222	0.005299
08-208	Mixedwood Plains	0-1	770.31	168.92	54.23	29.1	112.6	49.07	43.69	19.41	2.63	17.12		(x-3)-(x-2)	Bottom	37-38	32	5.5	86.74	76.05	21.87	14.47	87.31	25.49	114.02	13.48	0	8.15		64.87	64.87	77.4144	-12.5444			44.0721	-81.4139	14	0.406706	274	0.659073
08-209	Mixedwood Plains	0-1	946.52	62.87	18.2	5.61	15.48	15.5	80.1	6.14	0	3.3		(x-3)-(x-2)	Bottom	37-38	32	5.5	16.08	26.05	11.52	5.05	25.19	14.24	0	2.96	0	2.92		4.56	8.33	26.535	-21.975			45.217	-81.558	13	1.64353	188	0.02433
08-211	Mixedwood Plains	0-1	1972.95	192.64	27.71	24.8	41.42	71.36	43.84	16.36	0	14.97		(x-3)-(x-2)	Bottom	31-32	32	-0.5	23.94	131.69	34.63	25.32	23.48	72.79	14.01	16.49	7.38	15.23		-10.69	8.33	134.102	-144.792			45.7236	-81.8785	3.2	2.28216	246	9.8e-05
08-213	Mixedwood Plains	0-1	1195.96	101.65	22.77	12.51	61.22	22.07	34.41	9.28	0	7.12		(x-3)-(x-2)	Bottom	41-42	32	9.5	0	55.35	19.63	11.15	72.2	20.49	0	7.39	0	6.4		-19.63	8.33	56.4619	-76.0919			45.8896	-81.9374	11	2.73948	193	0.108736
08-214	Mixedwood Plains	0-1	836.75	104.76	14.17	15.58	96.86	28.75	31.41	10.95	0	9.16		(x-3)-(x-2)	Bottom	39-40	32	7.5	0	133.06	0	26.01	117.65	45.35	0	17	0	14.99		0	8.33	135.578	-135.578			44.0072	-78.0296	3	0.115208	174	0.512586
08-215	Mixedwood Plains	0-1	98.87	17.75	55.6	3.47	72.42	9.05	3.37	1.86	0	1.75		(x-3)-(x-2)	Bottom	38-39	32	6.5	82.15	12.69	61.64	2.79	63.07	6.45	0.35	1.29	0	1.27		20.51	20.51	12.9931	7.51692			42.8745	-82.1831	1.3	0.128924	189	0.88327
11-317	Montane Cordillera	0-1	485.01	36.87	37.34	3.64	44.55	7.79	36.31	3.64	0	2.27		(x-3)-(x-2)	Bottom	27-28	32	-4.5	55.84	17.33	34.1	2.98	43.2	6.29	0.73	1.91	0	1.81		21.74	21.74	17.5843	4.15565			50.9578	-118.396	16	0.122526	539	0.00586
11-342	Montane Cordillera	0-1	715.76	46.5	53.17	4.68	71.36	9.86	68.56	5	0	2.08		(x-3)-(x-2)	Bottom	25-26	32	-6.5	62.2	15.89	51.84	3.89	54.75	7.9	0	1.84	0	1.67		10.36	10.36	16.3592	-5.99922			50.1441	-115.475	18	4.06084	1144	0.017047
11-343	Montane Cordillera	0-1	163.04	23.31	22.96	4.68	38.9	10.18	13.79	2.93	0	2.25		(x-3)-(x-2)	Bottom	40-41	32	8.5	33.35	12.92	27.2	3	31.35	6.28	0	1.52	0.47	1.41		6.15	8.33	13.2637	-7.11372			49.7797	-115.735	14	1.04395	772	0.124649
11-344	Montane Cordillera	0-1	346.1	97.51	26.42	14.46	91.4	33.31	33.98	13.67	0	9.75		(x-3)-(x-2)	Bottom	44-45	32	12.5	33.73	121.46	0	19.45	144.76	47.15	0	17.21	0	13.39		33.73	33.73	123.007	-89.2775			49.418	-115.313	4.5	1.35809	850	0.078897
11-345	Montane Cordillera	0-1	1570.91	98.58	10.78	7.22	19.17	15.35	4.1	4.11	0	3.57		(x-3)-(x-2)	Bottom	50-51	32	18.5	29.99	40.02	9.83	9.12	17.41	19.51	0	5.31	0	4.49		20.16	20.16	41.046	-20.886			49.2458	-115.236	18	0.127246	785	0.119165
11-471	Montane Cordillera	0-1	226.18	35.29	20.81	5.02	62.84	12.51	9.2	3.97	0	3.28		(x-3)-(x-2)	Bottom	39-40	32	7.5	8.12	44.68	17.03	7.43	62.07	18.14	0	5.58	0	5.01		-8.91	8.33	45.2936	-54.2036			54.6569	-126.925	22.1	1.7349	583	0.572498
11-476	Montane Cordillera	0-1	223.88	68.33	39.64	10.23	147.38	26.12	15.69	8.28	0	6.95		(x-3)-(x-2)	Bottom	41.5-42.5	32	10	15.09	24.71	29.85	4.21	48.21	10	0	3.02	0	2.7		-14.76	8.33	25.0661	-39.8261			54.077	-125.758	8.4	0.253119	742	0.086482
11-477	Montane Cordillera	0-1	59.31	48.44	32.82	7.66	37.02	24.04	26.39	6.43	0	5.22		(x-3)-(x-2)	Bottom	41-42	32	9.5	5.59	74.51	27.93	12.05	96.33	40.83	0.84	9.26	0	8.64		-22.34	8.33	75.4781	-97.8181			54.2425	-125.062	6.8	1.68378	809	0.083757
11-479	Montane Cordillera	0-1	405.27	51.39	20.39	6.67	62.88	16.82	32.05	6.11	0	4.5		(x-3)-(x-2)	Bottom	43-44	32	11.5	0	35.74	21	6.19	64.67	15.4	0	4.47	0	4.13		-21	8.33	36.2721	-57.2721			53.428	-124.546	9.2	0.505207	1101	0
11-480	Montane Cordillera	0-1	362.62	45.97	12.68	6.7	49.53	15.65	76.06	8.72	0	4.14		(x-3)-(x-2)	Bottom	40-41	32	8.5	0	22.74	12.23	4.44	15.65	9.31	0	3.63	0	2.56		-12.23	8.33	23.1694	-35.3994			53.5806	-124.731	7.9	0.64262	905	0.000224
11-482	Montane Cordillera	0-1	760.79	56.31	13.29	5.78	47.18	12.89	62.67	7.28	0	3.55		(x-3)-(x-2)	Bottom	45-46	32	13.5	17.68	28.86	14.03	5.69	48.85	13.3	0	4.34	0	3.36		3.65	8.33	29.4156	-25.7656			53.8754	-124.755	7.2	0.110364	1027	0
11-485	Montane Cordillera	0-1	502.03	71.8	33.36	11.3	56.45	24.65	47.18	10.82	0	6.73		(x-3)-(x-2)	Bottom	37-38	32	5.5	0	26.89	12.99	5.34	47.69	11.79	0	4.04	0	3.03		-12.99	8.33	27.4151	-40.4051			53.8101	-125.914	9.2	0.415278	909	0.190476
11-486	Montane Cordillera	0-1	85.54	26.88	34.69	5.02	58.96	11.16	11.1	3.89	0	2.75		(x-3)-(x-2)	Bottom	32-33	32	0.5	1.56	27.29	21.19	4.94	62.83	11.8	0	3.84	0	2.81		-19.63	8.33	27.7335	-47.3635			53.9938	-125.981	8.1	0.176897	785	0.292652
11-491	Montane Cordillera	0-1	274.77	33.51	16.38	5.01	52.27	11.51	39.81	5.41	2.63	3.01		(x-3)-(x-2)	Bottom	44-45	32	12.5	15.32	16.29	16.92	3.13	37.2	7.16	0	2.38	0	1.78		-1.6	8.33	16.588	-18.188			54.1208	-123.005	5.6	7.08123	744	0.149816
11-495	Montane Cordillera	0-1	80.19	26.05	13.76	4.63	46.71	10.5	9.29	3.88	0	2.66		(x-3)-(x-2)	Bottom	42-43	32	10.5	3.6	23.07	16.31	4.52	45.94	10.22	0	3.58	0.25	2.69		-12.71	8.33	23.5086	-36.2186			52.1188	-122.075	24.1	6.84507	571	0.061161
11-499	Montane Cordillera	0-1	156.79	26.07	12.49	4.09	40.13	9.61	30.62	4.44	2.04	2.51		(x-3)-(x-2)	Bottom	29-30	32	-2.5	0	21.18	11.87	4.37	30.07	9.48	0	3.3	0	2.55		-11.87	8.33	21.6261	-33.4961			51.4736	-123.887	28	5.59965	1213	0.002988
11-503	Montane Cordillera	0-1	100.09	35.73	18.39	6.36	28.38	13.56	28.59	5.81	0	3.65		(x-3)-(x-2)	Bottom	44-45	32	12.5	12.29	27.23	6.12	5.19	37.65	11.86	0.72	4.33	0	3.07		6.17	8.33	27.7202	-21.5502			52.0117	-125.008	4.5	2.12872	956	0.001092
11-509	Montane Cordillera	0-1	1180.62	200.68	402.72	37.52	682.03	84.27	0	25.3	4.83	19.31		(x-3)-(x-2)	Bottom	42-43	32	10.5	9.59	33.05	30.33	6.58	58.44	14.45	3.22	5.27	0	3.72		-20.74	8.33	33.6986	-54.4386			51.4919	-120.342	36	0.772349	1226	0.01924
11-512	Montane Cordillera	0-1	963.05	64.84	57.98	6.81	82.83	14.1	35.9	6.02	0	3.52		(x-3)-(x-2)	Bottom	35-36	32	3.5	48.99	29.68	24.48	5.78	44.64	12.53	1.01	4.56	0	3.23		24.51	24.51	30.2376	-5.72757			51.5929	-120.764	28	0.622784	1141	0.147498
11-538	Montane Cordillera	0-1	265.18	34.27	22.55	5.33	59.99	12.24	33.37	5.32	0	3.09		(x-3)-(x-2)	Bottom	40-41	32	8.5	18.95	28.89	26.39	5.66	66.35	12.84	0.5	4.49	0	3.26		-7.44	8.33	29.4392	-36.8792			54.3986	-126.023	5.2	0.187209	720	0.223273
11-539	Montane Cordillera	0-1	178.41	30.11	20.12	5.07	37.11	10.86	33.26	5.18	0	2.98		(x-3)-(x-2)	Bottom	44-45	32	12.5	33.35	30.61	17.38	5.83	50.09	13.15	0	4.33	0	3.45		15.97	15.97	31.1602	-15.1902			53.9575	-124.192	7.5	20.6043	710	0.283952
11-540	Montane Cordillera	0-1	464.84	46.74	19.1	6.26	39.48	13.71	66.13	7.76	0	3.67		(x-3)-(x-2)	Bottom	30-31	32	-1.5	0	31.42	10.42	6.2	51.3	14.21	0	4.88	0	3.66		-10.42	8.33	32.0259	-42.4459			54.5745	-123.808	6.1	0.123061	862	0.284371
11-542	Montane Cordillera	0-1	1059.24	67.66	26.61	5.29	34.9	11	157.05	11.92	0	3.14		(x-3)-(x-2)	Bottom	35-36	32	3.5	25.14	15.59	21.67	3.13	36.1	6.89	0	2.26	0	1.65		3.47	8.33	15.9011	-12.4311			55.1316	-124.482	50	15.0584	921	0.016145
11-547	Montane Cordillera	0-1	416.15	61.64	23.01	9.53	75.68	21.25	38.77	8.92	2.01	5.67		(x-3)-(x-2)	Bottom	33-34	32	1.5	0	66	24.05	12.8	101.64	28.53	0	9.99	0	7.44		-24.05	8.33	67.2298	-91.2798			53.6074	-123.489	19	8.20892	813	0.038664
11-625	Montane Cordillera	0-1	2183.76	143.15	40.96	11.6	92.04	25.49	35.05	10.68	0	6.85		(x-3)-(x-2)	Bottom	44-45	32	12.5	0	74.45	15.16	14.16	65.76	30.59	0	11.22	0	8.11		-15.16	8.33	75.7846	-90.9446			54.4166	-122.618	27	0.383407	717	0.020255
11-631	Montane Cordillera	0-1	569.3	59.71	13.63	7.96	41.45	18.1	128.22	12.32	0	4.87		(x-3)-(x-2)	Bottom	52-53	32	20.5	54.44	38.66	15.91	6.7	37.93	14.49	4.36	5.61	0	4.09		38.53	38.53	39.2363	-0.706279			52.9494	-122.421	8.6	5.26544	597	0.413828
12-460	Pacific Maritime	0-1	1242.27	86.42	21.2	8.16	29.71	17.15	19.61	7.13	0	4.86		(x-3)-(x-2)	Bottom	42-43	32	10.5	32.99	23.43	19.31	4.35	35.44	9.32	26.01	4.25	0.08	2.48		13.68	13.68	23.8304	-10.1504			49.0447	-122.311	12.2	0.158298	54	0.918255
12-463	Pacific Maritime	0-1	941.89	66.78	19.82	6.69	41.01	14.49	112.5	9.99	2.86	4.11		(x-3)-(x-2)	Bottom	40.5-41.5	32	9	72.44	52.81	19.92	9.65	49.08	20.82	4.09	7.74	0	5.75		52.52	52.52	53.6844	-1.16444			49.6472	-124.023	53.9	0.594366	37	0.143877
12-473	Pacific Maritime	0-1	959.4	62.74	44.65	5.84	54.99	11.99	151.41	11.57	3.42	3.32		(x-3)-(x-2)	Bottom	43.5-44.5	32	12	27.62	14.48	37.98	3.12	43.33	6.44	0	1.97	0.19	1.68		-10.36	8.33	14.8123	-25.1723			54.9347	-127.554	15.5	0.680251	672	0.017465
12-475	Pacific Maritime	0-1	1024.17	63.73	29.71	4.94	55.57	10.75	56.46	6.03	0	2.8		(x-3)-(x-2)	Bottom	37-38	32	5.5	15.6	31.21	18.23	5.71	47.34	13.05	1.76	4.53	0	3.21		-2.63	8.33	31.728	-34.358			54.2095	-130.148	34.1	2.53817	67	0.011316
12-530	Pacific Maritime	0-1	561.71	58.31	36.6	8.2	28.56	16.48	6.52	6.54	0	4.73		(x-3)-(x-2)	Bottom	30-31	32	-1.5	12.52	19.93	17.94	3.69	38.75	8.13	1.1	2.82	0	2.12		-5.42	8.33	20.2687	-25.6887			55.6493	-128.645	15	0.530264	429	0
12-634	Pacific Maritime	0-1	163.96	43.65	9.92	7.41	57.85	16.93	31.29	7.21	0	4.55		(x-3)-(x-2)	Bottom	36-37	32	4.5	0	28.95	9.19	5.57	33.4	12.22	29.96	5.48	0	3.27		-9.19	8.33	29.481	-38.671			48.5266	-123.397	19	2.2461	65	0.573124
12-637	Pacific Maritime	0-1	1054.27	90.35	23.11	10.84	29.57	22.5	12.52	9.18	0	6.35		(x-3)-(x-2)	Bottom	43-44	32	11.5	0	68.18	3.26	12.79	80.82	29.57	0	10.87	0	7.68		-3.26	8.33	69.3693	-72.6293			48.7842	-123.425	12	0.182647	67	0.213973
12-639	Pacific Maritime	0-1	384.27	86.92	23.57	12.81	81.87	41.69	62.5	11.72	0	8.87		(x-3)-(x-2)	Bottom	40-41	32	8.5	11.8	76.73	11.43	12.32	46.6	41.74	0	9.34	0	8.9		0.37	8.33	77.7128	-77.3428			48.8904	-123.543	16	1.78614	42	0.282081
12-643	Pacific Maritime	0-1	116.56	78.58	32.16	11.91	46.59	38.69	0	9.08	0	8.03		(x-3)-(x-2)	Bottom	29-30	32	-2.5	4.18	79.46	10.28	13.63	41.8	44.45	0	9.97	0	8.97		-6.1	8.33	80.6205	-86.7205			48.4374	-123.522	14	0.16403	66	0.894265
12-649	Pacific Maritime	0-1	1202.66	151.87	43.59	20.43	136.77	46.67	8.25	17.42	0	13.27		(x-3)-(x-2)	Bottom	36-37	32	4.5	0	57.09	0.27	9.78	50.05	22.34	0	8.7	0	6.28		-0.27	8.33	57.9216	-58.1916			48.9083	-123.721	16	0.238446	55	0.554622
12-653	Pacific Maritime	0-1	621.18	68.9	12.66	8.26	39.44	18	51.85	8.96	0.15	5.56		(x-3)-(x-2)	Bottom	38-39	32	6.5	51.64	70.82	11.08	11.9	79.35	27.52	4.84	10.23	0	7.81		40.56	40.56	71.8128	-31.2528			49.1788	-124.155	13	0.120645	362	0.138376
12-658	Pacific Maritime	0-1	1076.55	77.86	28.61	6.41	58.03	14.54	48.3	7.06	1.13	4.17		(x-3)-(x-2)	Bottom	35-36	32	3.5	0	49.62	17.15	8.48	54	18.76	0	7.02	0	5.62		-17.15	8.33	50.3394	-67.4894			50.1169	-125.499	38	6.2376	205	0.028246
12-668	Pacific Maritime	0-1	739.19	71.84	7.14	7.86	36.74	17.6	54.59	8.83	0	5.3		(x-3)-(x-2)	Bottom	39-40	32	7.5	0	34.26	4.75	5.86	39.9	13.61	0	5.11	0	3.89		-4.75	8.33	34.7575	-39.5075			49.8808	-125.55	32	5.0125	369	0.03109
12-672	Pacific Maritime	0-1	676.1	59.97	4.35	6.34	45.5	14.6	43.08	6.98	0	4.15		(x-3)-(x-2)	Bottom	30-31	32	-1.5	8.83	55.94	11.17	9.29	37.05	20.09	0	7.87	0	6.01		-2.34	8.33	56.7062	-59.0462			49.211	-124.017	14	0.390359	111	0.850441
12-673	Pacific Maritime	0-1	1263.06	143.07	7.82	18.78	117.39	40.77	11.69	15.89	15.94	12.85		(x-3)-(x-2)	Bottom	38-39	32	6.5	14.04	51.96	14.71	9.03	42.89	20.1	0	7.52	0	5.9		-0.67	8.33	52.7388	-53.4088			49.6367	-125.018	11.5	0.200289	136	0.237613
12-674	Pacific Maritime	0-1	1523.2	117.25	10.76	10.17	18.75	22.08	26.28	9.84	0	6.85		(x-3)-(x-2)	Bottom	39-40	32	7.5	15.99	65.73	7.51	11.03	60.35	25.47	0	9.51	0	7.25		8.48	8.48	66.649	-58.169			49.5595	-124.815	16.5	0.153586	51	0.167542
12-678	Pacific Maritime	0-1	414.51	51.67	9.1	6.97	29.11	14.98	29.58	6.84	0	4.63		(x-3)-(x-2)	Bottom	36-37	32	4.5	37.88	48.02	10.88	8.15	52.02	18.34	0	6.88	0	5.28		27	27	48.7067	-21.7067			49.8532	-124.445	13	0.618027	171	0.016784
10-285	Prairies	0-1	128.19	54.84	41.06	10.1	62.38	18.52	0.87	6.39	0	5.61		(x-3)-(x-2)	Bottom	50-51	47	3.5	69.46	31.72	36.32	6.33	63.05	11.66	65.87	6.08	0	3.41		33.14	33.14	32.3454	0.794563			50.7856	-103.952	15.6	18.4524	476	0.743313
10-347	Prairies	0-1	293.07	31.9	19.81	3.99	48.42	9.42	21.58	3.87	0	2.6		(x-3)-(x-2)	Bottom	26-27	47	-20.5	6.79	8.92	15.05	1.61	25.69	3.7	0	1.06	0	1.01		-8.26	8.33	9.06413	-17.3241			49.0114	-113.457	4.3	0.942428	1381	0.038607
10-348	Prairies	0-1	43.59	13.44	34.58	2.45	39.25	5.12	5.81	1.66	0	1.41		(x-3)-(x-2)	Bottom	21-23	47	-25	10.86	9.33	31.25	1.89	34.78	3.78	1.02	1.07	0	1.04		-20.39	8.33	9.51951	-29.9095			49.0685	-112.719	2.5	4.05919	1248	0.405353
10-353	Prairies	0-1	312.65	42.69	52.84	6.13	70.94	18.62	0.74	4.09	0	3.87		(x-3)-(x-2)	Bottom	38-39	47	-8.5	23.98	19.58	32.86	3.44	51.76	10.58	0	2.25	0	2.16		-8.88	8.33	19.8799	-28.7599			49.6673	-110.296	8.1	2.17498	1229	0.053928
10-355	Prairies	0-1	348.74	32.9	71.86	4.8	88.75	10.53	22.21	3.42	0	2.62		(x-3)-(x-2)	Bottom	51-52	47	4.5	29.41	18.16	71.87	3.86	75.91	8.05	0	1.97	0	2.04		-42.46	8.33	18.5657	-61.0257			49.9865	-107.935	9.7	2.9859	825	0.64705
10-358	Prairies	0-1	546.23	49.72	33.96	5.62	64.33	13.7	15.48	4.73	0	3.74		(x-3)-(x-2)	Bottom	44-45	47	-2.5	23.01	15.81	35.51	2.94	52.21	6.92	0	1.86	0	1.83		-12.5	8.33	16.081	-28.581			49.8334	-102.332	3.8	1.53161	742	0.066404
10-359	Prairies	0-1	125.25	45.61	17.26	6.75	50.67	22	46.8	6.55	0	4.65		(x-3)-(x-2)	Bottom	52-53	47	5.5	0	27.21	24.55	4.6	43.75	14.7	0	3.19	1.54	3.16		-24.55	8.33	27.5961	-52.1461			49.8138	-102.397	2.6	0.140407	751	0.000809
10-360	Prairies	0-1	476.75	110.95	23.53	20.49	61.93	43.42	4.68	12.03	0	9.98		(x-3)-(x-2)	Bottom	51-52	47	4.5	44.67	10.17	39.59	2.57	40.03	5.03	0	1.13	0	1.07		5.08	8.33	10.4897	-5.4097			49.814	-102.31	8	8.26721	742	0.065871
10-361	Prairies	0-1	410.31	136.51	25.03	20.5	89.99	68.1	5.81	15.97	0	13.76		(x-3)-(x-2)	Bottom	52-53	47	5.5	50.57	49.44	24.33	8.03	67.02	26.51	0	5.75	0	5.31		26.24	26.24	50.0879	-23.8479			49.8396	-102.426	4.4	0.62596	743	0.000439
10-414	Prairies	0-1	321.94	73.7	15.09	13.25	85.77	24.07	17.37	9.13	0	7.52		(x-3)-(x-2)	Bottom	48-49	47	1.5	0.9	36.83	20.74	7.43	44.92	13.49	0	4.88	0	4.38		-19.84	8.33	37.572	-57.412			51.3162	-102.877	7.8	0.229291	522	0.855634
10-435	Prairies	0-1	129.2	21.97	8.22	3	26.23	10.1	6.43	2.48	0	2.11		(x-3)-(x-2)	Bottom	53-54	47	6.5	9.98	23.13	28.93	3.95	39.99	12.02	0	2.65	0	2.56		-18.95	8.33	23.4649	-42.4149			52.739	-109.653	15	81.1927	597	0.330701
10-598	Prairies	0-1	320.02	44.99	26.2	6.11	84.21	15.8	28.54	5.44	0	4.01		(x-3)-(x-2)	Bottom	60-61	47	13.5	7.78	15.14	27.29	2.84	47.52	6.98	0	1.89	0	1.75		-19.51	8.33	15.4041	-34.9141			53.6788	-112.854	4.8	5.46817	712	0.054392
18-322	Semi-Arid Plateaux	0-1	2272.84	140.37	51.6	9.44	73.82	19.99	143.76	11.77	2.34	4.55		(x-3)-(x-2)	Bottom	51-52	47	4.5	10.88	17.62	21.46	4.36	34.26	9.36	0	2.15	0	1.92		-10.58	8.33	18.1514	-28.7314			50.5367	-119.499	12	0.681834	1457	0.060525
18-323	Semi-Arid Plateaux	0-1	107.55	28.01	27.28	5.12	45.61	9.37	27.11	4.12	0	2.95		(x-3)-(x-2)	Bottom	50-51	47	3.5	9.08	42.39	38.27	8.56	62.83	15.76	0	5.46	0	4.79		-29.19	8.33	43.2456	-72.4356			50.3184	-119.256	8	4.08166	390	0.341604
18-327	Semi-Arid Plateaux	0-1	405.53	68.23	23.24	11.14	89.1	20.21	3.61	7.22	0	6.47		(x-3)-(x-2)	Bottom	46-47	47	-0.5	1.43	58.47	16.06	11.39	65.33	20.84	0.34	7.52	0	6.76		-14.63	8.33	59.5691	-74.1991			49.8568	-119.612	30	0.145	494	0.309511
18-328	Semi-Arid Plateaux	0-1	65.59	64.14	9.61	11.98	94.61	22.23	6.49	7.94	0	7.04		(x-3)-(x-2)	Bottom	50-51	47	3.5	4.43	26.61	19.28	5.3	41.32	9.54	0	3.43	0	3.01		-14.85	8.33	27.1327	-41.9827			50.6211	-120.05	5	0.107685	548	0.072519
18-329	Semi-Arid Plateaux	0-1	325.31	111.61	12.06	19.9	99.38	35.82	24.53	13.57	0	11.26		(x-3)-(x-2)	Bottom	51-52	47	4.5	0	90.45	0	17.79	59.11	32.33	0	11.66	0	10.19		0	8.33	92.1829	-92.1829			50.4722	-120.152	20	1.61218	1145	0.012975
18-334	Semi-Arid Plateaux	0-1	523.85	49.14	7.18	5.53	37.94	12.35	45.63	5.81	3.26	3.77		(x-3)-(x-2)	Bottom	45-46	47	-1.5	23.07	31.64	10.36	5.38	11.95	10.82	0	3.85	0	3.38		12.71	12.71	32.0941	-19.3841			49.8948	-120.31	3.5	0.162995	1513	0.148662
18-335	Semi-Arid Plateaux	0-1	13.19	38.62	16.5	7.51	18.53	12.56	0	4.73	0	4.36		(x-3)-(x-2)	Bottom	50-51	47	3.5	1.24	49.58	19.76	10.09	52.98	18.52	8.86	7.04	0.72	5.74		-18.52	8.33	50.5963	-69.1163			50.1664	-120.528	53	24.8423	625	0.027637
18-336	Semi-Arid Plateaux	0-1	688.64	65.09	26.71	8.63	58.52	15.58	54.68	7.36	0	4.96		(x-3)-(x-2)	Bottom	44-45	47	-2.5	5.84	38.9	24.56	7.98	52.16	14.22	0	4.96	0	4.4		-18.72	8.33	39.7101	-58.4301			49.7153	-119.923	11	0.142034	1555	0.083333
18-337	Semi-Arid Plateaux	0-1	213.48	27.47	50.05	5.44	65.59	11.54	8.68	2.98	0	2.56		(x-3)-(x-2)	Bottom	45-46	47	-1.5	42.03	16.7	55.16	4.21	59.74	8.38	0	1.83	0	1.82		-13.13	8.33	17.2225	-30.3525			49.41	-119.585	55	19.5364	339	0.110092
18-339	Semi-Arid Plateaux	0-1	0	37.12	30.98	7.2	49.14	12.69	4.56	4.78	0	4.19		(x-3)-(x-2)	Bottom	48-49	47	1.5	16.86	22.18	35.17	4.44	56.07	8.48	40.44	4.06	0	2.46		-18.31	8.33	22.62	-40.93			49.2888	-119.532	24	2.82764	326	0.110456
18-340	Semi-Arid Plateaux	0-1	35.99	20.66	1.42	3.19	11.98	6.86	0.64	2.45	0	2.15		(x-3)-(x-2)	Bottom	44-45	47	-2.5	0	17.68	3.52	2.95	13.04	6.09	0	2.15	0	2		-3.52	8.33	17.9244	-21.4444			49.2891	-119.582	15	0.177989	474	0.020666
18-341	Semi-Arid Plateaux	0-1	1326.61	148.95	18.12	21.98	72.96	39.03	39.63	15.61	0	12.14		(x-3)-(x-2)	Bottom	47-48	47	0.5	0	69.4	19.13	13.38	71.92	23.82	0	8.56	0	7.83		-19.13	8.33	70.678	-89.808			49.829	-119.839	18	0.109005	1055	0.165549
18-550	Semi-Arid Plateaux	0-1	433.6	59.28	18.28	8.05	75.39	18.69	99.84	11.33	0	5.31		(x-3)-(x-2)	Bottom	38-39	47	-8.5	7.65	41.5	21.4	7.09	43.62	15.63	0	5.86	0	4.71		-13.75	8.33	42.1013	-55.8513			50.4031	-121.085	14	0.568626	1533	0.060165
14-571	Taiga Cordillera	0-1	431.21	88.7	24.17	12.69	73.81	41.26	50.46	10.98	0	8.79		(x-3)-(x-2)	Bottom	19-20	22	-2.5	40.68	81.4	52.24	13.73	103.07	44.75	0	9.72	2.36	9.2		-11.56	8.33	82.5498	-94.1098			64.8485	-138.347	5.2	1.29295	981	0.00012
14-584	Taiga Cordillera	0-1	130.27	61.72	12.32	9.63	54.09	21.96	8.21	8.66	0	6.61		(x-3)-(x-2)	Bottom	19-20	22	-2.5	21.72	33.04	22.02	5.9	58.79	13.16	0	4.67	0	3.85		-0.3	8.33	33.5627	-33.8627			64.6502	-138.392	3.3	0.207667	1121	0.000755
14-585	Taiga Cordillera	0-1	110.31	37.81	46.34	6.02	69.66	18.94	6.06	4.37	0	3.94		(x-3)-(x-2)	Bottom	19-20	22	-2.5	14.72	19.92	39.06	3.46	37.98	10.23	0	2.31	0	2.21		-24.34	8.33	20.2183	-44.5583			64.735	-138.365	1.4	0.123857	1077	0.033278
04-574	Taiga Plains	0-1	381.38	86.36	17.75	12.06	85.23	28.19	50.48	11.06	0.79	8.67		(x-3)-(x-2)	Bottom	19-20	22	-2.5	40.41	80.84	26.79	12.98	98.19	29.85	0	9.68	0	9.08		13.62	13.62	81.8754	-68.2554			67.4178	-133.923	1	0.099021	79	0.041806
04-575	Taiga Plains	0-1	418.12	44.22	19.04	5.33	46.43	13	20.85	4.53	0	3.63		(x-3)-(x-2)	Bottom	19-20	22	-2.5	23.09	20.37	20.3	3.47	42.02	8.16	0	2.66	0.57	2.23		2.79	8.33	20.6634	-17.8734			67.3818	-134.041	1.7	0.241822	65	0.059369
04-579	Taiga Plains	0-1	144.28	21.86	54.92	3.64	59.79	12.07	0	2.16	0	2.22		(x-3)-(x-2)	Bottom	19-20	22	-2.5	45.55	16.46	48.46	3.05	54.97	8.33	0	1.8	0	1.81		-2.91	8.33	16.7402	-19.6502			68.2328	-133.44	15	35.6649	5	0.002224
04-580	Taiga Plains	0-1	306.12	51.06	28.39	7.14	71.48	16.85	18.22	5.98	2.45	4.9		(x-3)-(x-2)	Bottom	19-20	22	-2.5	0	16.38	20.16	2.94	43.3	7.09	0	2.06	0.63	1.85		-20.16	8.33	16.6418	-36.8018			67.4699	-134.721	1	0.73233	39	0.079692
04-611	Taiga Plains	0-1	443.49	43.45	14.32	5.23	52.91	13.12	71.74	6.4	0.21	3.58		(x-3)-(x-2)	Bottom	19-20	22	-2.5	15.84	11.08	16.84	2.02	25.15	4.64	2.48	1.54	0	1.25		-1	8.33	11.2626	-12.2626			60.0638	-116.848	1	0.417719	286	0.002819
04-612	Taiga Plains	0-1	905.15	186.31	16	25.11	177.83	59.7	25.95	20.82	0	17.67		(x-3)-(x-2)	Bottom	19-20	22	-2.5	0	85.34	18.2	13.1	126.82	31.75	5.38	10.23	0	9.3		-18.2	8.33	86.3396	-104.54			60.7213	-114.996	6.5	0.696052	215	0.053958
04-615	Taiga Plains	0-1	1005	160.28	25.26	21.65	112.74	72.48	40.85	17.91	0	15.07		(x-3)-(x-2)	Bottom	19-20	22	-2.5	0	47.61	15.46	7.97	64.01	26.81	10.79	6.4	0	5.66		-15.46	8.33	48.2725	-63.7325			59.5349	-112.217	21.6	2.96103	266	0.023197
04-616	Taiga Plains	0-1	220.21	50.41	10.9	7.11	44	16.78	9.97	6.01	0	4.91		(x-3)-(x-2)	Bottom	19-20	22	-2.5	3.29	18.1	5.68	3.07	11.81	7.1	1.79	2.39	0	2.09		-2.39	8.33	18.3585	-20.7485			59.9442	-111.854	1.2	0.412268	208	0.01162
04-617	Taiga Plains	0-1	501.87	92.68	16.39	12.47	97.03	29.9	59.07	11.79	0	8.89		(x-3)-(x-2)	Bottom	19-20	22	-2.5	3.72	42.17	9.65	6.87	61.14	16.99	0	5.13	0	4.73		-5.93	8.33	42.7259	-48.6559			60.5966	-116.263	1	0.327378	274	0
04-618	Taiga Plains	0-1	295.85	113.63	30.69	17.01	96.14	39.36	10.98	13.73	0	11.67		(x-3)-(x-2)	Bottom	19-20	22	-2.5	6.82	23.88	12.92	3.86	37.94	9.3	0	2.82	0	2.6		-6.1	8.33	24.19	-30.29			61.8909	-116.542	1.8	0.79663	224	0.003638
04-619	Taiga Plains	0-1	209.22	32.7	11.39	4.5	40.88	11.09	0.89	3.37	0	3.11		(x-3)-(x-2)	Bottom	19-20	22	-2.5	0	10.96	5.45	1.85	16.1	4.59	0	1.38	0.96	1.27		-5.45	8.33	11.115	-16.565			62.5561	-116.433	0.65	0.139027	252	0.024532
04-620	Taiga Plains	0-1	415.69	72	5.78	9.49	63.47	23.03	1.17	7.38	0	6.69		(x-3)-(x-2)	Bottom	19-20	22	-2.5	0	19.79	9.99	3.33	31.94	8.27	1.31	2.48	1.11	2.29		-9.99	8.33	20.0682	-30.0582			61.9988	-116.331	1.3	0.657526	209	0.018815
04-621	Taiga Plains	0-1	413.44	74.62	26.28	10.05	88.3	23.67	12.48	8.08	0	6.96		(x-3)-(x-2)	Bottom	19-20	22	-2.5	8.44	14.78	21.51	2.62	27.17	6.11	1.29	1.84	0	1.66		-13.07	8.33	15.0104	-28.0804			61.9306	-116.52	1.4	0.419718	223	0.047438
04-622	Taiga Plains	0-1	326.76	68.16	20.44	9.56	85.92	23.78	167.01	14.04	0	6.64		(x-3)-(x-2)	Bottom	19-20	22	-2.5	16.63	29.12	14.44	4.77	68.46	12.07	1.09	3.62	0	3.27		2.19	8.33	29.5081	-27.3181			59.7989	-122.523	1.2	0.078111	481	0
