# Supplementary material
Source: Research Square preprint supplement (doi:10.21203/rs.3.rs-9359156/v1)
Supplement: Supplementary file 1 [file fa9907f352ade64ffbf9948f.docx]

1. Ady, F. D., & Patoine, A. (2016). Impacts of land use and climate variability on algal communities since ~1850 CE in an oligotrophic estuary in northeastern New Brunswick, Canada. Journal of Paleolimnology, 55(2), 151–165. https://doi.org/10.1007/s10933-015-9871-1
2. Anderson, L., Abbott, M. B., Finney, B. P., & Burns, S. J. (2005). Regional atmospheric circulation change in the North Pacific during the Holocene inferred from lacustrine carbonate oxygen isotopes, Yukon Territory, Canada. Quaternary Research, 64(1), 21–35. https://doi.org/10.1016/j.yqres.2005.03.005
3. Antoniades, D., Douglas, M. S. V., & Smol, J. P. (2005). Quantitative estimates of recent environmental changes in the Canadian High Arctic inferred from diatoms in lake and pond sediments. Journal of Paleolimnology, 33(3), 349–360. https://doi.org/10.1007/s10933-004-6611-3
4. Barst, B. D., Ahad, J. M. E., Rose, N. L., Jautzy, J. J., Drevnick, P. E., Gammon, P. R., Sanei, H., & Savard, M. M. (2017). Lake-sediment record of PAH, mercury, and fly-ash particle deposition near coal-fired power plants in Central Alberta, Canada. Environmental Pollution, 231, 1461–1470. https://doi.org/10.1016/j.envpol.2017.08.033
5. Bird, B. W., Abbott, M. B., Finney, B. P., & Kutchko, B. (2009). A 2000 year varve-based climate record from the central Brooks Range, Alaska. Journal of Paleolimnology, 41(1), 25–41. https://doi.org/10.1007/s10933-008-9262-y
6. Boeff, K. A., Strock, K. E., & Saros, J. E. (2016). Evaluating planktonic diatom response to climate change across three lakes with differing morphometry. Journal of Paleolimnology, 56(1), 33–47. https://doi.org/10.1007/s10933-016-9889-z
7. Bouchard, F., MacDonald, L. A., Turner, K. W., Thienpont, J. R., Medeiros, A. S., Biskaborn, B. K., ... & Wolfe, B. B. (2017). Paleolimnology of thermokarst lakes: A window into permafrost landscape evolution. Arctic Science, 3(2), 91–117. https://doi.org/10.1139/as-2016-0022
8. Bouchard, F., Pienitz, R., Ortiz, J. D., Francus, P., & Laurion, I. (2013). Palaeolimnological conditions inferred from fossil diatom assemblages and derivative spectral properties of sediments in thermokarst ponds of subarctic Quebec, Canada. Boreas, 42(3), 575–595. https://doi.org/10.1111/bor.12000
9. Bredesen, E. L., Bos, D. G., Laird, K. R., & Cumming, B. F. (2002). A cladoceran-based paleolimnological assessment of the impact of forest harvesting on four lakes from the central interior of British Columbia, Canada. Journal of Paleolimnology, 28(4), 389-402. https://doi.org/10.1023/A:1021887915458
10. Bunbury, J., & Gajewski, K. (2012). Temperatures of the past 2000 years inferred from lake sediments, southwest Yukon Territory, Canada. Quaternary Research, 77(3), 355–367. https://doi.org/10.1016/j.yqres.2012.01.002
11. Bunting, L., Leavitt, P. R., Simpson, G. L., Wissel, B., Laird, K. R., Cumming, B. F., St. Amand, A., & Engstrom, D. R. (2016). Increased variability and sudden ecosystem state change in Lake Winnipeg, Canada, caused by 20th century agriculture. Limnology and Oceanography, 61(6), 2090–2107. https://doi.org/10.1002/lno.10355
12. Campbell, C. (1998). Late Holocene lake sedimentology and climate change in southern Alberta, Canada. Quaternary Research, 49(1), 96–101. https://doi.org/10.1006/qres.1997.1946
13. Chipman, M. L., Clarke, G. H., Clegg, B. F., Gregory-Eaves, I., & Hu, F. S. (2009). A 2000 year record of climatic change at Ongoke Lake, southwest Alaska. Journal of Paleolimnology, 41(1), 57–75. https://doi.org/10.1007/s10933-008-9257-8
14. Clerk, S., Hall, R. I., Quinlan, R., & Smol, J. P. (2000). Quantitative inferences of past hypolimnetic anoxia and nutrient levels from a Canadian Precambrian Shield lake. Journal of Paleolimnology, 23(3), 319–336. https://doi.org/10.1023/A:1008147127606
15. Coleman, K. A., Palmer, M. J., Korosi, J. B., Kokelj, S. V., Jackson, K., Hargan, K. E., ... & Smol, J. P. (2015). Tracking the impacts of recent warming and thaw of permafrost peatlands on aquatic ecosystems: A multi-proxy approach using remote sensing and lake sediments. Boreal Environment Research, 20, 363–377.
16. Cook, R. B., Kreis, R. G., Kingston, J. C., Camburn, K. E., Norton, S. A., Mitchell, M. J., Fry, B., & Shane, L. C. K. (1990). Paleolimnology of McNearney Lake: An acidic lake in northern Michigan. Journal of Paleolimnology, 3(1), 13–34. https://doi.org/10.1007/BF00209297
17. Couillard, Y., Cattaneo, A., Gallon, C., & Courcelles, M. (2008). Sources and chronology of fifteen elements in the sediments of lakes affected by metal deposition in a mining area. Journal of Paleolimnology, 40(1), 97-114. https://doi.org/10.1007/s10933-007-9146-6
18. Couillard, Y., Courcelles, M., Cattaneo, A., & Wunsam, S. (2004). A test of the integrity of metal records in sediment cores based on the documented history of metal contamination in Lac Dufault (Québec, Canada). Journal of Paleolimnology, 32(2), 149–162. https://doi.org/10.1023/B:JOPL.0000029429.13621.68
19. Das, B., Narwani, A., Matthews, B., Nordin, R., & Mazumder, A. (2009). Anthropogenic disturbance history influences the temporal coherence of paleoproductivity in two lakes. Journal of Paleolimnology, 42(2), 167–181. https://doi.org/10.1007/s10933-008-9269-4
20. Davis, R. B., Anderson, D. S., Dixit, S. S., Appleby, P. G., & Schauffler, M. (2006). Responses of two New Hampshire (USA) lakes to human impacts in recent centuries. Journal of Paleolimnology, 35(4), 669–697. https://doi.org/10.1007/s10933-005-4505-7
21. Davis, R. B., Anderson, D. S., Norton, S. A., & Whiting, M. C. (1994). Acidity of twelve northern New England (USA) lakes in recent centuries. Journal of Paleolimnology, 12(2), 103-154. https://doi.org/10.1007/BF00678090
22. Deasley, K., Korosi, J. B., Thienpont, J. R., Kokelj, S. V., Pisaric, M. F. J., & Smol, J. P. (2012). Investigating the response of Cladocera to a major saltwater intrusion event in an Arctic lake from the outer Mackenzie Delta (NT, Canada). Journal of Paleolimnology, 48(2), 287–296. https://doi.org/10.1007/s10933-012-9577-6
23. Deshpande, B. N., Tremblay, R., Pienitz, R., & Vincent, W. F. (2014). Sedimentary pigments as indicators of cyanobacterial dynamics in a hypereutrophic lake. Journal of Paleolimnology, 52, 171–184. https://doi.org/10.1007/s10933-014-9785-3
24. Devlin, J. E., & Finkelstein, S. A. (2011). Local physiographic controls on the responses of Arctic lakes to climate warming in Sirmilik National Park, Nunavut, Canada. Journal of Paleolimnology, 45(1), 23-39. https://doi.org/10.1007/s10933-010-9477-6
25. Dixit, A. S., & Dixit, S. S. (1989). Surface-sediment chrysophytes from 35 Quebec lakes and their usefulness in reconstructing lake-water pH. Canadian journal of botany, 67(7), 2071-2076. https://doi.org/10.1007/s10933-010-9440-6
26. Dixit, A. S., Alpay, S., Dixit, S. S., & Smol, J. P. (2007). Paleolimnological reconstructions of Rouyn-Noranda lakes within the zone of influence of the Horne Smelter, Québec, Canada. Journal of Paleolimnology, 38(2), 209–226. https://doi.org/10.1007/s10933-006-9072-z
27. Drevnick, P. E., Cooke, C. A., Barraza, D., Blais, J. M., Coale, K. H., Cumming, B. F., ... Wolfe, B. B. (2016). Spatiotemporal patterns of mercury accumulation in lake sediments of western North America. Science of the Total Environment, 568, 1157–1170. https://doi.org/10.1016/j.scitotenv.2016.03.167
28. Dunnington, D. W., Spooner, I. S., White, C. E., Cornett, R. J., Williamson, D., & Nelson, M. (2016). A geochemical perspective on the impact of development at Alta Lake, British Columbia, Canada. Journal of Paleolimnology, 56, 315–330. https://doi.org/10.1007/s10933-016-9919-x
29. Dupuis, L. V., Hann, B. J., & Paterson, M. (2015). Littoral cladoceran community reassembly following the cessation of disturbance. Journal of Paleolimnology, 54(1), 121–135. https://doi.org/10.1007/s10933-015-9841-7
30. Edlund, M. B., Engstrom, D. R., Triplett, L. D., Lafrancois, B. M., & Leavitt, P. R. (2009). Twentieth century eutrophication of the St. Croix River (Minnesota–Wisconsin, USA) reconstructed from the sediments of its natural impoundment. Journal of Paleolimnology, 41(4), 641–657. https://doi.org/10.1007/s10933-008-9296-1
31. Edlund, M. B., Schottler, S. P., Reavie, E. D., Engstrom, D. R., Baratono, N. G., Leavitt, P. R., ... & Paterson, A. M. (2017). Historical phosphorus dynamics in Lake of the Woods (USA–Canada)—does legacy phosphorus still affect the southern basin?. Lake and Reservoir Management, 33(4), 386-402. https://doi.org/10.1080/10402381.2017.1373172
32. Enache, M. D., & Cumming, B. F. (2007). Charcoal morphotypes in lake sediments from British Columbia (Canada): An assessment of their utility for the reconstruction of past fire and precipitation. Journal of Paleolimnology, 38(3), 347–363. https://doi.org/10.1007/s10933-006-9084-8
33. Ennis, M. (2010). Paleolimnological reconstruction of hydrologic change in the Slave River and Great Slave Lake during the past millennium (Master’s thesis, Wilfrid Laurier University). https://scholars.wlu.ca/etd/1013/
34. Francis, D. R. (2001). A record of hypolimnetic oxygen conditions in a temperate multi-depression lake from chemical evidence and chironomid remains. Journal of Paleolimnology, 25(3), 351–365. https://doi.org/10.1023/A:1011152709997
35. Gajewski, K., Hamilton, P. B., & McNeely, R. (1997). A high resolution proxy-climate record from an Arctic lake with annually-laminated sediments on Devon Island, Nunavut, Canada. Journal of Paleolimnology, 17(2), 215–225. https://doi.org/10.1023/A:1007984617675
36. Gallagher, L., Macdonald, R. W., & Paton, D. W. (2004). The historical record of metals in sediments from six lakes in the Fraser River Basin, British Columbia. Water, Air, & Soil Pollution, 152(1–4), 257–278. https://doi.org/10.1023/B:WATE.0000015349.25371.af
37. Garrison, P. J., & Fitzgerald, S. A. (2005). The role of shoreland development and commercial cranberry farming in a lake in Wisconsin, USA. Journal of Paleolimnology, 33(2), 169-188. https://pubs.usgs.gov/publication/70029081
38. Garrison, P. J., & Wakeman, R. S. (2000). Use of paleolimnology to document the effect of lake shoreland development on water quality. Journal of Paleolimnology, 24(4), 369–393. https://doi.org/10.1023/A:1008107706726
39. Ginn, B. K., Rate, M., Cumming, B. F., & Smol, J. P. (2010). Ecological distribution of scaled-chrysophyte assemblages from the sediments of 54 lakes in Nova Scotia and southern New Brunswick, Canada. Journal of Paleolimnology, 43(2), 293–308. https://doi.org/10.1007/s10933-009-9332-9
40. Ginn, B. K., Stewart, L. J., Cumming, B. F., & Smol, J. P. (2007). Surface-water acidification and reproducibility of sediment cores from Kejimkujik Lake, Nova Scotia, Canada. Water, Air, & Soil Pollution, 183(1–4), 15–24. https://doi.org/10.1007/s11270-006-9311-y
41. Gobeil, C., Tessier, A., & Couture, R.-M. (2013). Upper Mississippi Pb as a mid-1800s chronostratigraphic marker in sediments from seasonally anoxic lakes in Eastern Canada. Geochimica et Cosmochimica Acta, 113, 125–135. https://doi.org/10.1016/j.gca.2013.02.023
42. Gonyo, A. W., Yu, Z., & Bebout, G. E. (2012). Late Holocene change in climate and atmospheric circulation inferred from geochemical records at Kepler Lake, south-central Alaska. Journal of Paleolimnology, 48(1), 55–67. https://doi.org/10.1007/s10933-012-9603-8
43. Gregory-Eaves, I., Smol, J. P., Douglas, M. S. V., & Finney, B. P. (2003). Diatoms and sockeye salmon (Oncorhynchus nerka) population dynamics: Reconstructions of salmon-derived nutrients over the past 2,200 years in two lakes from Kodiak Island, Alaska. Journal of Paleolimnology, 30(1), 35–53. https://doi.org/10.1023/A:1024792831385
44. Griffiths, K., Michelutti, N., Blais, J. M., Kimpe, L. E., & Smol, J. P. (2010). Comparing nitrogen isotopic signals between bulk sediments and invertebrate remains in High Arctic seabird-influenced ponds. Journal of Paleolimnology, 44(2), 405–412. https://doi.org/10.1007/s10933-009-9354-3
45. Haig, H. A., Kingsbury, M. V., Laird, K. R., Leavitt, P. R., Laing, R., & Cumming, B. F. (2013). Assessment of drought over the past two millennia using near-shore sediment cores from a Canadian boreal lake. Journal of Paleolimnology, 50(2), 175–190. https://doi.org/10.1007/s10933-013-9712-z
46. Hall, R. I., Leavitt, P. R., Dixit, A. S., Quinlan, R., & Smol, J. P. (1999). Limnological succession in reservoirs: a paleolimnological comparison of two methods of reservoir formation. Canadian Journal of Fisheries and Aquatic Sciences, 56(6), 1109-1121. https://doi.org/10.1139/f99-047
47. Hall, R. I., Leavitt, P. R., Quinlan, R., Dixit, A. S., & Smol, J. P. (1999). Effects of agriculture, urbanization, and climate on water quality in the northern Great Plains. Limnology and Oceanography, 44(3, part 2), 739–756. https://doi.org/10.4319/lo.1999.44.3_part_2.0739
48. Hall, R. I., Leavitt, P. R., Smol, J. P., & Zirnhelt, N. (1997). Comparison of diatoms, fossil pigments and historical records as measures of lake eutrophication. Freshwater Biology, 38(2), 401–417. https://doi.org/10.1046/j.1365-2427.1997.00251.x
49. Hamilton, P. B., Lavoie, I., Alpay, S., & Ponader, K. (2015). Using diatom assemblages and sulfur in sediments to uncover the effects of historical mining on Lake Arnoux (Quebec, Canada): A retrospective of economic benefits vs. environmental debt. Frontiers in Ecology and Evolution, 3, Article 99. https://doi.org/10.3389/fevo.2015.00099
50. Hargan, K. E., Nelligan, C., Jeziorski, A., Rühland, K. M., Paterson, A. M., Keller, W., & Smol, J. P. (2016). Tracking the long-term responses of diatoms and cladocerans to climate warming and human influences across lakes of the Ring of Fire in the Far North of Ontario, Canada. Journal of Paleolimnology, 56(2), 153–172. https://doi.org/10.1007/s10933-016-9901-7
51. Hargan, K. E., Nelligan, C., Jeziorski, A., Rühland, K. M., Paterson, A. M., Keller, W., & Smol, J.P. (2016). Tracking the long-term responses of diatoms and cladocerans to climate warming and human influences across lakes of the Ring of Fire in the Far North of Ontario, Canada. Journal of Paleolimnology, 56, 153–172. https://doi.org/10.1007/s10933-016-9901-7
52. Harris, M. A., Cumming, B. F., & Smol, J. P. (2006). Assessment of recent environmental changes in New Brunswick (Canada) lakes based on paleolimnological shifts in diatom species assemblages. Canadian Journal of Botany, 84(1), 151–163. https://doi.org/10.1139/b05-157
53. Hausmann, S., & Pienitz, R. (2007). Seasonal climate inferences from high-resolution modern diatom data along a climate gradient: A case study. Journal of Paleolimnology, 38(1), 73–96. https://doi.org/10.1007/s10933-006-9061-2
54. Hobbs, W. O., & Wolfe, A. P. (2008). Recent paleolimnology of three lakes in the Fraser River Basin (BC, Canada): No response to the collapse of sockeye salmon stocks following the Hells Gate landslides. Journal of Paleolimnology, 40(1), 295–308. https://doi.org/10.1007/s10933-007-9161-7
55. Hobbs, W. O., Lalonde, S. V., Vinebrooke, R. D., Konhauser, K. O., Weidman, R. P., Graham, M. D., & Wolfe, A. P. (2010). Algal-silica cycling and pigment diagenesis in recent alpine lake sediments: Mechanisms and paleoecological implications. Journal of Paleolimnology, 44(2), 613–628. https://doi.org/10.1007/s10933-010-9441-5
56. Hobbs, W. O., Vinebrooke, R. D., & Wolfe, A. P. (2011). Biogeochemical responses of two alpine lakes to climate change and atmospheric deposition, Jasper and Banff National parks, Canadian Rocky Mountains. Canadian Journal of Fisheries and Aquatic Sciences, 68(8), 1480-1494. https://cdnsciencepub.com/doi/10.1139/f2011-058
57. Holtham, A. J., Gregory-Eaves, I., Pellatt, M. G., Selbie, D. T., Stewart, L., Finney, B. P., & Smol, J. P. (2004). The influence of flushing rates, terrestrial input and low salmon escapement densities on paleolimnological reconstructions of sockeye salmon (Oncorhynchus nerka) nutrient dynamics in Alaska and British Columbia. Journal of Paleolimnology, 32(3), 255–271. https://doi.org/10.1023/B:JOPL.0000042998.22164.ca
58. Hubeny, J. B., King, J. W., & Cantwell, M. (2009). Anthropogenic influences on estuarine sedimentation and ecology: Examples from the varved sediments of the Pettaquamscutt River Estuary, Rhode Island. Journal of Paleolimnology, 41(2), 297–314. https://doi.org/10.1007/s10933-008-9226-2
59. Jacobson, H. A., & Engstrom, D. R. (1989). Resolving the chronology of recent lake sediments: an example from Devils Lake, North Dakota. Journal of Paleolimnology, 2(2), 81-97. https://link.springer.com/article/10.1007/bf00177042
60. Karst-Riddoch, T. L., Pisaric, M. F. J., & Smol, J. P. (2005). Diatom responses to 20th century climate-related environmental changes in high-elevation mountain lakes of the northern Canadian Cordillera. Journal of Paleolimnology, 33(3), 265–282. https://doi.org/10.1007/s10933-004-5334-9
61. Kodama, K. P., Lyons, J. C., Siver, P. A., & Lott, A. M. (1997). A mineral magnetic and scaled-chrysophyte paleolimnological study of two northeastern Pennsylvania lakes: Records of fly ash deposition, land-use change, and paleorainfall variation. Journal of Paleolimnology, 17(2), 173–189. https://doi.org/10.1023/A:1007900318583
62. Koroluk, S. L., & De Boer, D. H. (2007). Land use change and erosional history in a lake catchment system on the Canadian prairies. Catena, 70(2), 155-168. https://doi.org/10.1016/j.catena.2006.08.006
63. Korosi, J. B., Cooke, C. A., Eickmeyer, D. C., Kimpe, L. E., & Blais, J. M. (2016). In-situ bitumen extraction associated with increased petrogenic polycyclic aromatic compounds in lake sediments from the Cold Lake heavy oil fields (Alberta, Canada). Environmental Pollution, 218, 915–922. https://doi.org/10.1016/j.envpol.2016.08.032
64. Köster, D., & Pienitz, R. (2006). Seasonal diatom variability and paleolimnological inferences – A case study. Journal of Paleolimnology, 35(4), 395–416. https://doi.org/10.1007/s10933-005-1334-7
65. Kurek, J., Kirk, J. L., Muir, D. C. G., Wang, X., Evans, M. S., & Smol, J. P. (2013). Legacy of a half century of Athabasca oil sands development recorded by lake ecosystems. Proceedings of the National Academy of Sciences, 110(5), 1761–1766. https://doi.org/10.1073/pnas.1217675110
66. Kurek, J., Kirk, J. L., Muir, D. C. G., Wang, X., Evans, M. S., & Smol, J. P. (2013). Legacy of a half century of Athabasca oil sands development recorded by lake ecosystems. Proceedings of the National Academy of Sciences, 110(5), 1761–1766. https://doi.org/10.1073/pnas.1217675110
67. Laing, T. E., & Pienitz, R. (2002). Evaluation of limnological responses to recent environmental change and caribou activity in the Rivière George region, Northern Québec, Canada. Arctic, Antarctic, and Alpine Research, 34(4), 454–464. https://doi.org/10.1080/15230430.2002.12003517
68. Laird, K. R., Cumming, B. F., Wunsam, S., Rusak, J. A., Oglesby, R. J., Fritz, S. C., & Leavitt, P. R. (2003). Lake sediments record large-scale shifts in moisture regimes across the northern prairies of North America during the past two millennia. Proceedings of the National Academy of Sciences, 100(5), 2483-2488. https://doi.org/10.1073/pnas.0530193100
69. Laird, K. R., Das, B., & Cumming, B. F. (2014). Enrichment of uranium, arsenic, molybdenum, and selenium in sediment cores from boreal lakes adjacent to northern Saskatchewan uranium mines. Lake and Reservoir Management, 30(4), 344–357. https://doi.org/10.1080/10402381.2014.933987
70. Laird, K. R., Fritz, S. C., & Cumming, B. F. (1998). A diatom-based reconstruction of drought intensity, duration, and frequency from Moon Lake, North Dakota: A sub-decadal record of the last 2300 years. Journal of Paleolimnology, 19(2), 161–179. https://doi.org/10.1023/A:1007929006001
71. Laird, K. R., Haig, H. A., Ma, S., Kingsbury, M. V., Brown, T. A., Lewis, C. M., ... & Cumming, B. F. (2012). Expanded spatial extent of the M edieval C limate A nomaly revealed in lake‐sediment records across the boreal region in northwest O ntario. Global Change Biology, 18(9), 2869-2881. https://doi.org/10.1111/j.1365-2486.2012.02740.x
72. Lamoureux, S. F. (1999). Spatial and interannual variations in sedimentation patterns recorded in nonglacial varved sediments from the Canadian High Arctic. Journal of Paleolimnology, 21(1), 73–84. https://doi.org/10.1023/A:1008064315316
73. Lamoureux, S. F., & Bradley, R. S. (1996). A late Holocene varved sediment record of environmental change from northern Ellesmere Island, Canada. Journal of Paleolimnology, 16, 239–255. https://doi.org/10.1007/BF00176939
74. Leavitt, P. (1999). Multiproxy record of prairie lake response to climatic change and human activity, Clearwater Lake, Saskatchewan.
75. Leavitt, P. R., Paul, A. J., Hardie, A. K., & Schindler, D. W. (1994). Fossil pigment records of phytoplankton in trout-stocked alpine lakes. Canadian Journal of Fisheries and Aquatic Sciences, 51(11), 2411–2423. https://doi.org/10.1139/f94-241
76. Lewis, T., Francus, P., & Bradley, R. S. (2009). Recent occurrence of large jökulhlaups at Lake Tuborg, Ellesmere Island, Nunavut. Journal of Paleolimnology, 41(3), 491–506. https://doi.org/10.1007/s10933-008-9240-4
77. Lim, D. S., Smol, J. P., & Douglas, M. S. (2008). Recent environmental changes on Banks Island (NWT, Canadian Arctic) quantified using fossil diatom assemblages. Journal of Paleolimnology, 40(1), 385-398. https://doi.org/10.1007/s10933-007-9168-0
78. Marsicano, L. J., & Siver, P. A. (1993). A paleolimnological assessment of lake acidification in five Connecticut lakes. Journal of Paleolimnology, 9(3), 209–221. https://doi.org/10.1007/BF00677214
79. Mayer, B., Alpay, S., Gould, W. D., Lortie, L., & Rosa, F. (2007). The onset of anthropogenic activity recorded in lake sediments in the vicinity of the Horne smelter in Quebec, Canada: sulfur isotope evidence. Applied Geochemistry, 22(2), 397-414. https://doi.org/10.1016/j.apgeochem.2006.10.001
80. Medeiros, A. S., Friel, C. E., Finkelstein, S. A., & Quinlan, R. (2012). A high resolution multi-proxy record of pronounced recent environmental change at Baker Lake, Nunavut. Journal of Paleolimnology, 47(4), 661–676. https://doi.org/10.1007/s10933-012-9589-2
81. Medioli, B. E., Dixit, A. S., Smol, J. P., Anderson, T. W., & Burbidge, S. M. (2005). Paleolimnological evidence of terrestrial and lacustrine environmental change in response to European settlement of the Red River Valley, Manitoba and North Dakota. Géographie physique et Quaternaire, 59(2–3), 263–275. https://doi.org/10.7202/014756ar
82. Michelutti, N., Blais, J. M., Liu, H., Keatley, B. E., Douglas, M. S. V., Mallory, M. L., & Smol, J. P. (2008). A test of the possible influence of seabird activity on the 210Pb flux in high Arctic ponds at Cape Vera, Devon Island, Nunavut: Implications for radiochronology. Journal of Paleolimnology, 40(3), 783–791. https://doi.org/10.1007/s10933-008-9198-2
83. Michelutti, N., Hay, M. B., Marsh, P., Lesack, L., & Smol, J. P. (2001). Diatom changes in lake sediments from the Mackenzie Delta, N.W.T., Canada: Paleohydrological applications. Arctic, Antarctic, and Alpine Research, 33(1), 1–12. https://doi.org/10.1080/15230430.2001.12003398
84. Moingt, M., Lucotte, M., Paquet, S., & Ghaleb, B. (2014). Deciphering the impact of land-uses on terrestrial organic matter and mercury inputs to large boreal lakes of central Québec using lignin biomarkers. Applied geochemistry, 41, 34-48. https://doi.org/10.1016/j.apgeochem.2013.11.008
85. Moore, J. J., Hughen, K. A., Miller, G. H., & Overpeck, J. T. (2001). Little Ice Age recorded in summer temperature reconstruction from varved sediments of Donard Lake, Baffin Island, Canada. Journal of Paleolimnology, 25(4), 503–517. https://doi.org/10.1023/A:1011181301514
86. Munoz, S. E., Gajewski, K., & Peros, M. C. (2010). Proximity to ice fields and lake depth as modulators of paleoclimate records: a regional study from southwest Yukon, Canada. Journal of Paleolimnology, 44(1), 61–80. https://doi.org/10.1007/s10933-014-9787-1
87. Ostrofsky, M. L., & Schworm, A. E. (2011). A history of acid mine contamination, recovery, and eutrophication in Sandy Lake, Pennsylvania. Journal of Paleolimnology, 46(2), 229–242. https://doi.org/10.1007/s10933-011-9535-8
88. Outridge, P. M., Rausch, N., Percival, J. B., Shotyk, W., & McNeely, R. (2011). Comparison of mercury and zinc profiles in peat and lake sediment archives with historical changes in emissions from the Flin Flon metal smelter, Manitoba, Canada. Science of the Total Environment, 409(3), 548-563. https://doi.org/10.1016/j.scitotenv.2010.10.041
89. Pal, S., Gregory-Eaves, I., & Pick, F. R. (2015). Temporal trends in cyanobacteria revealed through DNA and pigment analyses of temperate lake sediment cores. Journal of Paleolimnology, 54(1), 87–101. https://doi.org/10.1007/s10933-015-9839-1
90. Pal, S., Gregory-Eaves, I., & Pick, F. R. (2015). Temporal trends in cyanobacteria revealed through DNA and pigment analyses of temperate lake sediment cores. Journal of Paleolimnology, 54(1), 87–101. https://doi.org/10.1007/s10933-015-9839-1
91. Pan, Y., & Brugam, R. (1997). Human disturbance and trophic status changes in Crystal Lake, McHenry County, Illinois, USA. Journal of Paleolimnology, 17(4), 369-376. https://link.springer.com/article/10.1023/A:1007952403488
92. Paterson, M. J. (1994). Paleolimnological reconstruction of recent changes in assemblages of Cladocera from acidified lakes in the Adirondack Mountains (New York). Journal of Paleolimnology, 11(2), 189–200. https://doi.org/10.1007/BF00686865
93. Paul, C. A., Douglas, M. S. V., & Smol, J. P. (2010). Diatom-inferred Holocene climatic and environmental changes in an unusually subsaline high Arctic nunatak pond on Ellesmere Island (Nunavut, Canada). Journal of Paleolimnology, 44(4), 913–929. https://doi.org/10.1007/s10933-010-9464-y
94. Peros, M. C., & Gajewski, K. (2009). Pollen-based reconstructions of late Holocene climate from the central and western Canadian Arctic. Journal of Paleolimnology, 41(1), 161–175. https://doi.org/10.1007/s10933-008-9256-9
95. Philibert, A., Prairie, Y. T., Campbell, I., & Laird, L. (2003). Effects of late Holocene wildfires on diatom assemblages in Christina Lake, Alberta, Canada. Canadian Journal of Forest Research, 33(12), 2405-2415. https://cdnsciencepub.com/doi/10.1139/x03-165
96. Phillips, V. J., St. Louis, V. L., Cooke, C. A., Vinebrooke, R. D., & Hobbs, W. O. (2011). Increased mercury loadings to western Canadian alpine lakes over the past 150 years. Environmental science & technology, 45(6), 2042-2047. https://pubs.acs.org/doi/10.1021/es1031135
97. Pisaric, M. F. J., Thienpont, J. R., Kokelj, S. V., Nesbitt, H., Lantz, T. C., Solomon, S., & Smol, J. P. (2011). Impacts of a recent storm surge on an Arctic delta ecosystem examined in the context of the last millennium. Proceedings of the National Academy of Sciences, 108(22), 8960–8965. https://doi.org/10.1073/pnas.1018527108
98. Reavie, E. D., & Baratono, N. G. (2007). Multi-core investigation of a lotic bay of Lake of the Woods (Minnesota, USA) impacted by cultural development. Journal of Paleolimnology, 38(2), 137–156. https://doi.org/10.1007/s10933-006-9069-7
99. Reavie, E. D., Hall, R. I., & Smol, J. P. (1995). An expanded weighted-averaging model for inferring past total phosphorus concentrations from diatom assemblages in eutrophic British Columbia (Canada) lakes. Journal of Paleolimnology, 14(1), 49–67. https://doi.org/10.1007/BF00682593
100. Reavie, E. D., Neill, K. E., Little, J. L., & Smol, J. P. (2006). Cultural eutrophication trends in three southeastern Ontario lakes: A paleolimnological perspective. Lake and Reservoir Management, 22(1), 44–58. https://doi.org/10.1080/07438140609353883
101. Reavie, E. D., Smol, J. P., & Carmichael, N. B. (1995). Postsettlement eutrophication histories of six British Columbia (Canada) lakes. Canadian Journal of Fisheries and Aquatic Sciences, 52(11), 2388-2401. https://cdnsciencepub.com/doi/10.1139/f95-831
102. Renberg, I., Bindler, R., & Brännvall, M.‑L. (2001). Four thousand years of atmospheric lead pollution in northern Europe: a summary from Swedish lake sediments. Journal of Paleolimnology, 25, 421–435. https://doi.org/10.1023/A:1011186100081
103. Rowell, H. C., Enache, M. D., Quinlan, R., Smith, A. J., Bloomfield, J. A., Charles, D. F., & Effler, S. W. (2016). Quantitative paleolimnological inference models applied to a high-resolution biostratigraphic study of lake degradation and recovery, Onondaga Lake, New York (USA). Journal of Paleolimnology, 55(2), 241–258. https://doi.org/10.1007/s10933-015-9877-8
104. Rühland, K. (2001). Diatom assemblage shifts relative to changes in environmental and climatic conditions in the circumpolar treeline regions of the Canadian and Siberian Arctic (Doctoral dissertation, Queen’s University). https://www.collectionscanada.gc.ca/obj/s4/f2/dsk3/ftp05/NQ63450.pdf
105. Rühland, K. M., Hargan, K. E., Jeziorski, A., Paterson, A. M., Keller, W., & Smol, J. P. (2014). A multi-trophic exploratory survey of recent environmental changes using lake sediments in the Hudson Bay Lowlands, Ontario, Canada. Arctic, Antarctic, and Alpine Research, 46(1), 139-158. https://doi.org/10.1657/1938-4246-46.1.139
106. Rühland, K., & Smol, J. P. (2005). Diatom shifts as evidence for recent Subarctic warming in a remote tundra lake, NWT, Canada. Palaeogeography, Palaeoclimatology, Palaeoecology, 226(1–2), 1–16. https://doi.org/10.1016/j.palaeo.2005.05.001
107. Sawyers, J. E., McNaught, A. S., & King, D. K. (2016). Recent and historic eutrophication of an island lake in northern Lake Michigan, USA. Journal of Paleolimnology, 55(1), 97–112. https://doi.org/10.1007/s10933-015-9867-x
108. Schroeder, L. A., Martin, S. C., Kerns, G. J., & McLean, C. E. (2016). Diatom assemblages in a reservoir sediment core track land-use changes in the watershed. Journal of Paleolimnology, 55(1), 17–33. https://doi.org/10.1007/s10933-015-9860-4
109. Serieyssol, C. A., Edlund, M. B., & Kallemeyn, L. W. (2009). Impacts of settlement, damming, and hydromanagement in two boreal lakes: A comparative paleolimnological study. Journal of Paleolimnology, 42(4), 497–513. https://doi.org/10.1007/s10933-008-9300-9
110. Shinneman, A. L. C., Umbanhowar, C. E., Edlund, M. B., Hobbs, W. O., Camill, P., & Geiss, C. (2016). Diatom assemblages reveal regional-scale differences in lake responses to recent climate change at the boreal-tundra ecotone, Manitoba, Canada. Journal of Paleolimnology, 56(3), 275–298. https://doi.org/10.1007/s10933-016-9911-5
111. Sinnatamby, R. N., Yi, Y., Sokal, M. A., Clogg-Wright, K. P., Asada, T., Vardy, S. R., ... Edwards, T. W. D. (2010). Historical and paleolimnological evidence for expansion of Lake Athabasca (Canada) during the Little Ice Age. Journal of Paleolimnology, 43, 705–717. https://doi.org/10.1007/s10933-009-9361-4
112. Sivarajah, B., Rühland, K. M., Labaj, A. L., Paterson, A. M., & Smol, J. P. (2016). Why is the relative abundance of Asterionella formosa increasing in a Boreal Shield lake as nutrient levels decline? Journal of Paleolimnology, 55(3), 357–367. https://doi.org/10.1007/s10933-016-9886-2
113. Siver, P. A., & Marsicano, L. J. (1994). Acidity of twelve northern New England (U.S.A.) lakes in recent centuries. Journal of Paleolimnology, 12, 103–154. https://doi.org/10.1007/BF00678090
114. Siver, P. A., & Marsicano, L. J. (2003). Estimating historical in-lake alkalinity generation from sulfate reduction and its relationship to lake chemistry as inferred from algal microfossils. Journal of Paleolimnology, 29(2), 179–197. https://doi.org/10.1023/A:1023246321517
115. Sonnenburg, E. P., Boyce, J. I., & Reinhardt, E. G. (2009). Multi-proxy paleoenvironmental record of colonial land-use change in the lower Rideau Canal system (Colonel By Lake), Ontario, Canada. Journal of Paleolimnology, 42(4), 515-532. https://link.springer.com/article/10.1007/s10933-008-9302-7
116. Stern, G. A., Sanei, H., Roach, P., Delaronde, J., & Outridge, P. M. (2009). Historical interrelated variations of mercury and aquatic organic matter in lake sediment cores from a subarctic lake in Yukon, Canada: further evidence toward the algal-mercury scavenging hypothesis. Environmental science & technology, 43(20), 7684-7690. https://doi.org/10.1021/es902186s
117. Stewart, E. M., Coleman, K. A., Korosi, J. B., Thienpont, J. R., Palmer, M. J., Blais, J. M., & Smol, J. P. (2015). Assessing environmental stressors on a commercial walleye fishery from a large northern ecosystem (Tathlina Lake) using water chemistry and paleolimnology. Journal of Great Lakes Research, 41(3), 813–823. https://doi.org/10.1016/j.jglr.2015.04.010
118. Stewart, E. M., Michelutti, N., Blais, J. M., Mallory, M. L., Douglas, M. S. V., & Smol, J. P. (2013). Contrasting the effects of climatic, nutrient, and oxygen dynamics on subfossil chironomid assemblages: A paleolimnological experiment from eutrophic High Arctic ponds. Journal of Paleolimnology, 49(2), 205–219. https://doi.org/10.1007/s10933-012-9658-6
119. Stewart, K. A., Lamoureux, S. F., & Finney, B. P. (2008). Multiple ecological and hydrological changes recorded in varved sediments from Sanagak Lake, Nunavut, Canada. Journal of Paleolimnology, 40(2), 217–233. https://doi.org/10.1007/s10933-007-9153-7
120. Stoermer, E. F., Kociolek, J. P., Schelske, C. L., & Andresen, N. A. (1991). Siliceous microfossil succession in the recent history of Green Bay, Lake Michigan. Journal of Paleolimnology, 6(2), 123–140. https://doi.org/10.1007/BF00153737
121. Summers, J. C., Kurek, J., Kirk, J. L., Muir, D. C. G., Wang, X., Wiklund, J. A., ... Smol, J. P. (2016). Recent warming, rather than industrial emissions of bioavailable nutrients, is the dominant driver of lake primary production shifts across the Athabasca Oil Sands Region. PLOS ONE, 11(5), e0153987. https://doi.org/10.1371/journal.pone.0153987
122. Thienpont, J. R., Korosi, J. B., Hargan, K. E., Williams, T., Eickmeyer, D. C., Kimpe, L. E., Palmer, M. J., Smol, J. P., & Blais, J. M. (2016). Multi-trophic level response to extreme metal contamination from gold mining in a subarctic lake. Proceedings of the Royal Society B: Biological Sciences, 283(1836), 20161125. https://doi.org/10.1098/rspb.2016.1125
123. Thienpont, J. R., Perreault, J. T., Korosi, J. B., Pisaric, M. F. J., & Blais, J. M. (2019). Have natural lake expansion and landscape inundation resulted in mercury increases in flooded lakes of the Great Slave Lowlands (Northwest Territories, Canada)? Journal of Paleolimnology, 61(3), 345–354. https://doi.org/10.1007/s10933-018-0063-7
124. Thienpont, J. R., Steele, C., Vermaire, J. C., Pisaric, M. F. J., Kokelj, S. V., & Smol, J. P. (2015). Synchronous changes in chironomid assemblages in two Arctic delta lake ecosystems after a major saltwater intrusion event. Journal of Paleolimnology, 53(2), 177–189. https://doi.org/10.1007/s10933-014-9815-1
125. Thomas, E. K., & Briner, J. P. (2009). Climate of the past millennium inferred from varved proglacial lake sediments on northeast Baffin Island, Arctic Canada. Journal of Paleolimnology, 41(1), 209-224. https://doi.org/10.1007/s10933-008-9258-7
126. Thomas, E. K., Briner, J. P., & Axford, Y. (2008). Rapid 20th century environmental change on northeastern Baffin Island, Arctic Canada inferred from a multi-proxy lacustrine record. Journal of Paleolimnology, 40, 507–517. https://doi.org/10.1007/s10933-007-9178-y
127. Thomas, E. K., McGrane, S., Briner, J. P., & Huang, Y. (2012). Leaf wax δ²H and varve-thickness climate proxies from proglacial lake sediments, Baffin Island, Arctic Canada. Journal of Paleolimnology, 48(1), 193–207. https://doi.org/10.1007/s10933-012-9584-7
128. Tomkins, J. D., Lamoureux, S. F., Antoniades, D., & Vincent, W. F. (2009). Sedimentary pellets as an ice-cover proxy in a High Arctic ice-covered lake. Journal of Paleolimnology, 41(1), 225–242. https://doi.org/10.1007/s10933-008-9255-x
129. Tremblay, V., Larocque-Tobler, I., & Sirois, P. (2010). Historical variability of subfossil chironomids (Diptera: Chironomidae) in three lakes impacted by natural and anthropogenic disturbances. Journal of Paleolimnology, 44(2), 483–495. https://doi.org/10.1007/s10933-010-9429-1
130. Twining, C. W., & Post, D. M. (2013). Cladoceran remains reveal presence of a keystone size-selective planktivore. Journal of Paleolimnology, 49(2), 253–266. https://doi.org/10.1007/s10933-012-9672-8
131. Uutala, A. J. (1990). Chaoborus (Diptera: Chaoboridae) mandibles—Paleolimnological indicators of the historical status of fish populations in acid-sensitive lakes. Journal of Paleolimnology, 4(2), 139–151. https://doi.org/10.1007/BF00226321
132. van Hengstum, P. J., Reinhardt, E. G., Boyce, J. I., & Clark, C. (2007). Changing sedimentation patterns due to historical land-use change in Frenchman’s Bay, Pickering, Canada: Evidence from high-resolution textural analysis. Journal of Paleolimnology, 37(4), 603–618. https://doi.org/10.1007/s10933-006-9057-y
133. Vermaire, J. C., Greffard, M. H., Saulnier-Talbot, É., & Gregory-Eaves, I. (2013). Changes in submerged macrophyte abundance altered diatom and chironomid assemblages in a shallow lake. Journal of Paleolimnology, 50(4), 447-456. https://link.springer.com/article/10.1007/s10933-013-9737-3
134. Watchorn, M. A., Hamilton, P. B., Anderson, T. W., Roe, H. M., & Patterson, R. T. (2008). Diatoms and pollen as indicators of water quality and land-use change: A case study from the Oak Ridges Moraine, Southern Ontario, Canada. Journal of Paleolimnology, 39(4), 491–509. https://doi.org/10.1007/s10933-007-9126-x
135. White, C. A. (2012). Sedimentary diatoms as indicators of water quality and ecosystem change in lakes of Riding Mountain National Park of Canada (Doctoral dissertation, University of British Columbia).
136. Wigdahl-Perry, C. R., Saros, J. E., Schmitz, J., Calcote, R., Rusak, J., Anderson, D., & Hotchkiss, S. (2016). Response of temperate lakes to drought: A paleolimnological perspective on the landscape position concept using diatom-based reconstructions. Journal of Paleolimnology, 55, 339–356. https://doi.org/10.1007/s10933-016-9883-5
137. Wilson, T. A., Amirbahman, A., Norton, S. A., & Voytek, M. A. (2010). A record of phosphorus dynamics in oligotrophic lake sediment. Journal of Paleolimnology, 44(2), 279–294. https://doi.org/10.1007/s10933-009-9403-y
138. Wolfe, B. B., Hall, R. I., Edwards, T. W. D., Vardy, S. R., Falcone, M. D., Sjunneskog, C., Sylvestre, F., McGowan, S., Leavitt, P. R., & van Driel, P. (2008). Hydroecological responses of the Athabasca Delta, Canada, to changes in river flow and climate during the 20th century. Ecohydrology, 1(2), 131–148. https://doi.org/10.1002/eco.13
139. Wolfe, B. B., Karst-Riddoch, T. L., Vardy, S. R., Falcone, M. D., Hall, R. I., & Edwards, T. W. D. (2005). Impacts of climate and river flooding on the hydro-ecology of a floodplain basin, Peace-Athabasca Delta, Canada since A.D. 1700. Quaternary Research, 64(2), 147–162. https://doi.org/10.1016/j.yqres.2005.05.001
140. Wolin, J. A. (1996). Late Holocene lake-level and lake development signals in Lower Herring Lake, Michigan. Journal of Paleolimnology, 15(1), 19–45. https://doi.org/10.1007/BF00176988
141. Wolin, J. A., & Stoermer, E. F. (2005). Response of a Lake Michigan coastal lake to anthropogenic catchment disturbance. Journal of Paleolimnology, 33(1), 73–94. https://doi.org/10.1007/s10933-004-1688-2
142. Zeeb, B. A., & Smol, J. P. (1991). Paleolimnological investigation of the effects of road salt seepage on scaled chrysophytes in Fonda Lake, Michigan. Journal of Paleolimnology, 5(3), 263–266. https://doi.org/10.1007/BF00200349
