# Supplementary material
Source: Research Square preprint supplement (doi:10.21203/rs.3.rs-9359156/v1)
Supplement: Supplementary file 2 [file b78addc7c621129dc4addfd4.xlsx]

## Sheet: Lit review sites
Lake	Ecozone	Latitude	Longitude	depth_published	cankrig
Verreault	Atlantic Highlands	48.9399	-65.3412	15.5	18.5708
Orignal	Atlantic Highlands	48.0833	-68.6694	20.5	19.1897
Landry	Atlantic Highlands	48.1255	-68.6312	17.5	19.0575
Holland	Atlantic Highlands	48.9487	-65.3757	28.5	19.0543
Carre	Atlantic Highlands	48.0931	-68.6537	31.5	19.1897
West Long	Atlantic Maritime	45.3502	-66.6666	28.8559	18.3591
Wolfe	Atlantic Maritime	45.6579	-65.1395	17.4771	20.9921
Kejimkujik	Atlantic Maritime	44.3786	-65.2216	20.4262	20.7664
Cundy	Atlantic Maritime	45.3654	-66.7194	17.3523	18.3591
BlackRiver	Atlantic Maritime	44.9332	-64.4078	19.4777	21.6953
A5	Atlantic Maritime	43.9508	-66.1452	21.13	18.7298
A52	Atlantic Maritime	46.7102	-60.5381	12.13	20.6804
A76	Atlantic Maritime	44.3677	-65.231	20.13	20.7664
A92	Atlantic Maritime	44.4014	-64.6436	30.1	21.8211
A124	Atlantic Maritime	44.7936	-63.8396	30.13	22.4766
A157	Atlantic Maritime	45.1649	-66.7947	18.88	17.2763
A160	Atlantic Maritime	46.7128	-60.396	30.13	22.4921
A163	Atlantic Maritime	45.6569	-65.1398	17.88	20.9921
Jenny	Boreal Cordillera	61.0438	-138.363	4.5	9.73265
JellyBean	Boreal Cordillera	60.3504	-134.801	16.25	14.2757
Kusawa	Boreal Cordillera	60.258	-136.204	8.5	12.9832
Cantlie	Boreal Cordillera	60.66	-134.826	14.5	14.2112
Cottonwood	Boreal Cordillera	60.364	-137.581	12.5	11.0398
Frederik	Boreal Cordillera	60.388	-136.654	5.5	10.6358
Granite	Boreal Cordillera	60.699	-137.09	7.5	11.5904
Howard	Boreal Cordillera	60.228	-136.814	17.5	11.6046
Ibex	Boreal Cordillera	60.505	-135.471	12.5	14.1182
John's	Boreal Cordillera	60.193	-135.873	12.5	12.5966
Kloo	Boreal Cordillera	60.954	-137.863	15.5	11.0915
KNPR	Boreal Cordillera	60.17	-137.746	3.5	10.0875
Lewes	Boreal Cordillera	60.383	-134.83	13.5	14.178
Louise	Boreal Cordillera	60.701	-135.278	30.22	15.6459
Louise	Boreal Cordillera	49.0316	-97.2293	30.22	34.4827
Moraine	Boreal Cordillera	60.943	-136.756	12.5	12.0687
Onion	Boreal Cordillera	60.095	-137.426	3.5	10.0201
Pine	Boreal Cordillera	60.817	-137.445	12.5	11.6643
Sockeye	Boreal Cordillera	60.503	-137.621	17.5	11.9718
St.Elias	Boreal Cordillera	60.317	-137.115	19.5	11.4864
Three guardsman	Boreal Cordillera	59.613	-136.451	7.5	10.7858
Trout	Boreal Cordillera	60.521	-137.706	11.5	10.5724
A14	Boreal Cordillera	58.4667	-124.467	11	13.5332
A45	Boreal Cordillera	58.5333	-124.533	8.01	13.5332
A166	Boreal Cordillera	60.44	-131.535	5	12.2254
Charlie	Boreal Plains	56.3244	-120.977	26.21	18.5976
10W	Boreal Plains	57.0569	-109.822	18.25	29.6557
ALB21b	Boreal Plains	57.1467	-110.865	10.75	25.1743
Brock	Boreal Plains	53.8177	-114.833	35.5	42.8883
Chip	Boreal Plains	53.6483	-115.36	43.5	43.4786
Hilda	Boreal Plains	54.5193	-110.431	27.75	34.6589
Isle	Boreal Plains	53.632	-114.695	46.5	44.9574
Jackfish	Boreal Plains	53.4852	-114.235	37.5	41.1008
LacLaNonne	Boreal Plains	53.9452	-114.341	41.5	41.4159
LacSteAnne	Boreal Plains	53.7085	-114.413	53.5	43.2276
Lessard	Boreal Plains	53.7852	-114.66	48.5	44.0514
Nora	Boreal Plains	50.4723	-99.9375	23.06	33.6162
Pigeon	Boreal Plains	53.0167	-114.03	42.5	41.429
Pine Lake	Boreal Plains	54.0667	-112.55	40.5	38.8223
Sandy	Boreal Plains	53.7864	-114.031	46.5	42.0464
SteAnne	Boreal Plains	53.7056	-114.394	33.5	41.447
Wabamun	Boreal Plains	53.5667	-114.583	33.5	43.2276
Wabamun1	Boreal Plains	53.5519	-114.697	60.5	44.9574
Winnipeg	Boreal Plains	50.7825	-96.7756	49.88	32.6127
Namur	Boreal Plains	57.4444	-112.621	11.85	30.9904
Otosan	Boreal Plains	57.7072	-112.388	19.85	27.8024
NE4	Boreal Plains	57.9583	-110.383	9.42	19.9225
SM7	Boreal Plains	55.6811	-111.827	23.88	34.0788
Touchwood	Boreal Plains	54.825	-111.404	29.44	34.5533
L12-26	Boreal Plains	54.8307	-110.509	15.28	33.5156
Christina	Boreal Plains	55.6667	-112.5	43.84	32.2447
NW35	Boreal Plains	57.1766	-111.998	10.84	26.5806
SW22	Boreal Plains	56.8098	-111.724	29.03	30.5497
NE13	Boreal Plains	57.0709	-111.475	16.92	26.7326
Ramp464	Boreal Plains	57.6546	-112.619	29.3	28.2056
Z-2014	Boreal Plains	57.4387	-112.554	54.95	30.9904
X-2014	Boreal Plains	57.358	-112.73	47.34	30.6742
Ramp175	Boreal Plains	57.3153	-112.398	47.12	31.7926
Ramp223	Boreal Plains	57.118	-112.003	24.38	26.5806
D-2014	Boreal Plains	56.9503	-113.025	19.19	30.6801
Y-2014	Boreal Plains	56.823	-113.267	29.11	31.3896
Ramp225	Boreal Plains	56.7708	-111.949	38.05	31.2538
Ramp226	Boreal Plains	56.8094	-111.724	36.39	30.5497
Kearl	Boreal Plains	57.2904	-111.238	26.77	28.3846
Ramp209	Boreal Plains	57.2308	-110.747	37.91	28.9298
Ramp185	Boreal Plains	57.1464	-110.863	27.98	25.1743
Ramp268	Boreal Plains	56.8936	-110.904	41.93	33.6568
B-2014	Boreal Plains	56.9853	-110.811	28.83	30.7254
Ramp271	Boreal Plains	56.6561	-110.25	44.88	32.6793
Gregoire	Boreal Plains	56.464	-111.147	48.99	34.2254
Pushup	Boreal Plains	56.3844	-110.949	38.98	32.9045
Big Peter Pond	Boreal Plains	56.0179	-108.908	40.32	31.8186
PAD23	Boreal Plains	58.3907	-111.445	33.41	23.4407
PAD31	Boreal Plains	58.4955	-111.519	13.18	23.2602
PAD39	Boreal Plains	58.4668	-111.179	20.72	22.1739
Katherine	Boreal Plains	50.66	-99.8964	36.04	33.589
Clear	Boreal Plains	50.6828	-100.008	34.06	33.589
Moon	Boreal Plains	50.8811	-100.053	39.13	35.8135
South	Boreal Plains	50.646	-100.01	9.05	33.589
12D	Boreal Shield	57.6192	-108.051	19.25	23.6821
7A	Boreal Shield	57.9882	-108.986	19.25	20.2558
8H	Boreal Shield	57.6714	-109.405	19.25	22.9015
9D	Boreal Shield	57.9559	-109.411	15.25	20.6262
I1	Boreal Shield	58.0484	-103.859	25.91	17.9351
I2	Boreal Shield	58.3316	-103.859	24.06	17.9427
I3	Boreal Shield	58.3221	-103.891	10.18	16.9158
I7	Boreal Shield	58.263	-103.866	18.95	17.9427
I9	Boreal Shield	58.3326	-103.826	19.97	17.9427
Kotyk	Boreal Shield	54.8978	-101.481	40	31.5233
L239	Boreal Shield	49.6629	-93.7234	7.13	28.024
L442	Boreal Shield	49.7747	-93.8176	13.86	28.356
Mclurg	Boreal Shield	55.0801	-102.885	24.5	28.6675
Meridian N.	Boreal Shield	54.753	-101.999	37.91	33.2961
Meridian S.	Boreal Shield	54.7452	-101.981	40.29	33.2961
Persian	Boreal Shield	54.7125	-101.551	37.89	31.1614
Phantom	Boreal Shield	54.7273	-101.866	38.5	33.2961
R1	Boreal Shield	58.3769	-104.177	16.25	16.2623
R11	Boreal Shield	58.4559	-104.033	15.04	16.2623
R2	Boreal Shield	58.3714	-104.109	8.25	16.2623
R6	Boreal Shield	58.4095	-104.144	15.99	16.2623
R7	Boreal Shield	58.4267	-104.068	12.3	16.2623
Raleigh	Boreal Shield	49.446	-91.9632	8.61	21.4069
Sask	Boreal Shield	55.3522	-102.647	23.37	28.3859
Big Narrows	Boreal Shield	49.3947	-94.7939	31.01	29.681
Sabaskong	Boreal Shield	49.1006	-94.4211	35.13	29.9872
Little Traverse	Boreal Shield	49.2463	-94.6714	22.2	29.457
Tantare	Boreal Shield	47.062	-71.5379	20.5	15.2949
Perron	Boreal Shield	47.8415	-78.2446	14.6116	19.6362
Pepiniere	Boreal Shield	48.5927	-78.2771	17.592	20.4327
Matagami	Boreal Shield	49.8427	-77.6358	18.4896	20.1995
Desperies	Boreal Shield	48.1863	-79.1587	12.5	19.2678
Dasserat	Boreal Shield	48.2731	-79.432	40	22.5064
Clair	Boreal Shield	46.9563	-71.6703	13.25	15.2949
Bonneville	Boreal Shield	47.2795	-71.4074	6.48	15.8477
Bedard	Boreal Shield	47.272	-71.1233	23.5	17.4441
223	Boreal Shield	49.6972	-93.7083	30.41	28.024
377	Boreal Shield	49.7202	-93.7746	29.7	28.024
A9	Boreal Shield	52.1946	-87.7663	6.11	12.2893
A10	Boreal Shield	49.6726	-72.645	12.95	16.9656
A30	Boreal Shield	47.9266	-78.9648	14.49	20.1726
A33	Boreal Shield	50.4376	-72.8186	21	16.6843
A47	Boreal Shield	45.6812	-76.205	18.3	21.7606
A51	Boreal Shield	48.3098	-78.9888	40.46	22.1914
A53	Boreal Shield	47.715	-70.6655	5.74	16.282
A56	Boreal Shield	51.5199	-87.8519	9.12	12.5618
A62	Boreal Shield	50.1839	-91.6986	7.81	20.6767
A63	Boreal Shield	45.6554	-75.994	21.3	20.8026
A65	Boreal Shield	46.0299	-81.3972	14.2	38.9293
A81	Boreal Shield	49.676	-93.7593	28.2	28.024
A86	Boreal Shield	48.3631	-92.1585	24.95	25.1951
A87	Boreal Shield	45.6237	-76.1871	22.3	20.8026
A99	Boreal Shield	50.5638	-72.5568	9.27	15.9406
A105	Boreal Shield	45.5425	-75.9008	22.5	21.1195
A118	Boreal Shield	45.3333	-79.1	22.4	35.0134
A119	Boreal Shield	48.593	-78.2771	19.05	20.4327
A120	Boreal Shield	47.8413	-78.2454	12.21	19.6362
A122	Boreal Shield	45.6113	-76.007	18.2	20.8026
A158	Boreal Shield	48.0975	-78.6805	19.46	20.5176
Round	Mixedwood Plains	44.5385	-76.3999	11.5719	30.4091
Long	Mixedwood Plains	44.5277	-76.4032	20.2235	30.4091
A130	Mixedwood Plains	46.7489	-71.3933	32.6	16.7897
A147	Mixedwood Plains	43.9508	-79.4144	119.79	63.6464
Moose	Montane Cordillera	52.9522	-118.91	26.58	19.9409
Stuart	Montane Cordillera	54.5169	-124.53	17.44	16.7815
Tabor	Montane Cordillera	53.9175	-122.543	34.61	18.7694
Norman	Montane Cordillera	53.7821	-123.362	22.5	17.1754
Harrsion	Montane Cordillera	51.5545	-115.811	8.5	8.69921
Moose2	Montane Cordillera	52.9622	-118.937	37.5	19.9409
Pipit	Montane Cordillera	51.617	-115.863	11.96	8.69921
Snowflake	Montane Cordillera	51.5981	-115.833	11.59	8.69921
Stuart1	Montane Cordillera	54.6611	-124.848	19	16.9645
Williams	Montane Cordillera	52.1167	-120.133	31.2663	27.2095
Curator	Montane Cordillera	52.7921	-117.863	5.95	16.3728
McConnel	Montane Cordillera	51.6382	-115.978	9	8.5154
Oesa	Montane Cordillera	51.3547	-116.304	6.81	8.25567
Opabin	Montane Cordillera	51.3412	-116.311	4.93	7.77074
David	Montane Cordillera	51.8438	-116.79	8.95	8.53943
Effeil	Montane Cordillera	51.3215	-116.243	4.19	7.77074
Goat	Montane Cordillera	51.4478	-115.859	6.61	8.39094
Sue	Montane Cordillera	50.9927	-115.629	14.78	8.67654
Caribou	Montane Cordillera	52.74	-117.797	9.22	13.9157
A16	Montane Cordillera	51.6668	-121.451	16.06	28.0419
A22	Montane Cordillera	53.6762	-124.517	9.25	15.2421
A60	Montane Cordillera	54.0757	-124.751	15.29	16.6857
A73	Montane Cordillera	54.325	-122.709	13.93	16.6069
A89	Montane Cordillera	53.8793	-124.89	17.07	16.7706
A102	Montane Cordillera	52.266	-120.932	15.23	29.151
A113	Montane Cordillera	51.3349	-119.837	11.2	31.9982
A117	Montane Cordillera	53.7463	-122.289	13.97	16.4787
A123	Montane Cordillera	51.617	-115.863	4.24	8.69921
A135	Montane Cordillera	53.6268	-124.336	7.86	16.3381
A156	Montane Cordillera	54.2941	-122.719	16.55	16.6069
A165	Montane Cordillera	53.5844	-123.596	12.75	16.4986
Harrison	Pacific Maritime	49.5753	-121.88	29.37	36.0563
Harrison1	Pacific Maritime	49.5753	-121.883	52.5	36.0563
A7	Pacific Maritime	50.1139	-122.981	11	31.0005
A70	Pacific Maritime	48.7567	-124.8	33.7	32.0029
A137	Pacific Maritime	48.6389	-123.641	14.91	31.4607
A143	Pacific Maritime	48.5614	-123.695	15.76	31.4607
Clearwater	Prairies	50.8833	-107.9	51.6	38.0035
Humboldt	Prairies	52.1464	-105.121	45.96	40.7892
Pasqua	Prairies	50.7833	-104	55.0514	37.9114
Thunstrom	Prairies	51.2291	-107.083	30.04	35.2883
Hassel	Prairies	53.4872	-113.173	19.16	40.2157
Buffalo Pound	Prairies	50.65	-105.5	27.04	36.4743
Horshoe	Prairies	49.339	-97.323	26.93	33.9171
Kamloops	Semi-Arid Plateaux	50.7781	-120.76	66.86	42.2338
Wood	Semi-Arid Plateaux	50.0865	-119.39	44.7	37.7229
Pinantan	Semi-Arid Plateaux	50.7241	-120.026	27.53	33.3897
Dutch	Semi-Arid Plateaux	51.6522	-120.056	20.26	32.119
Kamloops1	Semi-Arid Plateaux	50.7781	-120.758	67.5	42.2338
Nicola1	Semi-Arid Plateaux	50.1856	-120.498	47.5	35.4715
A125	Semi-Arid Plateaux	49.7507	-120.626	12.03	33.3526
A164	Semi-Arid Plateaux	50.067	-119.397	43.85	37.7229
Tathlina	Taiga Plains	60.5333	-117.5	4.52	15.9222
Falaise	Taiga Plains	61.4764	-116.153	13.14	14.4711
Trio1	Taiga Plains	61.6403	-116.052	7.29	14.2168
HC-3	Taiga Plains	68.3157	-133.726	16.34	15.1107
HC-4	Taiga Plains	68.2906	-133.884	13.33	14.8997
LC-1	Taiga Plains	68.3195	-133.778	16.8	15.1107
KAK1	Taiga Plains	61.0381	-117.551	22.14	17.2514
TAH7	Taiga Plains	60.5706	-116.904	18.22	16.9192
SR1	Taiga Plains	60.8027	-113.226	14.75	17.2636
SD34	Taiga Plains	61.1947	-113.564	15.25	14.7171
GSL1	Taiga Plains	61.1112	-113.568	12.25	14.7171
